# Supplementary material for: Acquiring preferred mode of aggregation through positional antagonism for saponification triggered gelation
Source: Royal Society of Chemistry journal article supplement (doi:10.1039/d2nj04858b), 2023-01-01
Supplement: d2nj04858b1.pdf [file d2nj04858b1.pdf]

## **Electronic Supplementary Information**

### **Acquiring preferred mode of aggregation through positional antagonism for saponification triggered gelation**

Prem Chand and Ashish Kumar\*

Department of Chemistry, Institute of Science, Banaras Hindu University,  
Varanasi - 221 005 (U.P.), India

---

#### **Dilution experiment:**

Stock solutions for **A-B** (c,  $5.0 \times 10^{-5}$  M) have been prepared in  $\text{CHCl}_3$  for UV-vis and fluorescence spectroscopy, based on dilution experiments. It is a basic optimization step for this class of gelation to determine the highest permissible concentration that can be employed for photophysical studies. Actually, proper gelation occurs using  $2.0 \times 10^{-2}$  M concentration of **A-B** (mentioned in experimental section 2.6) which was exceedingly high to carry out photophysical studies. Therefore, an intermediate concentration less than  $2.0 \times 10^{-2}$  M had to be determined which should also be suitable for measuring photophysical data without any significant change in properties of **A-B**. On dilution from  $\sim 10^{-4}$  to  $10^{-7}$  M, **A-B** did not exhibit any significant decomposition or dissociation and displayed only an obvious decrease in optical and fluorescence intensity (Fig. S10, ESI). It clearly indicated that an intermediate concentration i.e.  $5.0 \times 10^{-5}$  M can be used for UV-vis and fluorescence studies.

#### **Preparation of stock solutions for UV-vis and fluorescence study:**

$10^{-2}$  M solutions for **A** and **B** have been prepared by dissolving 0.1 equiv. (**A**, 80.6; **B**, 101.4 mg) in 10 mL of  $\text{CHCl}_3$ . This solution was further diluted 200 times by adding  $\text{CHCl}_3$  to obtain  $5.0 \times 10^{-5}$  M solutions which were directly used for photophysical studies.

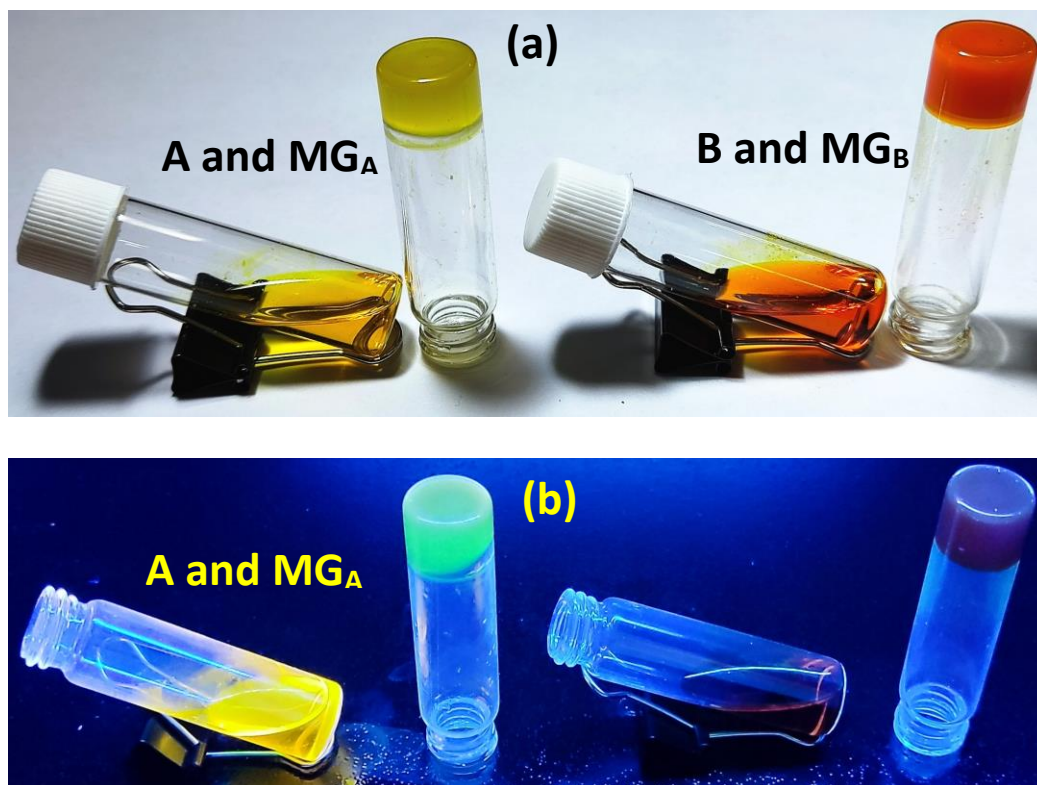

**Fig. S1** (a) Demonstration of gelation using complex **A** and **B**. **MG<sub>A</sub>** and **MG<sub>B</sub>** were tested by inverted vial method. (b) **A-B** and **MG<sub>A</sub>-MG<sub>B</sub>** observed under UV-vis lights ( $\lambda=365$  nm).

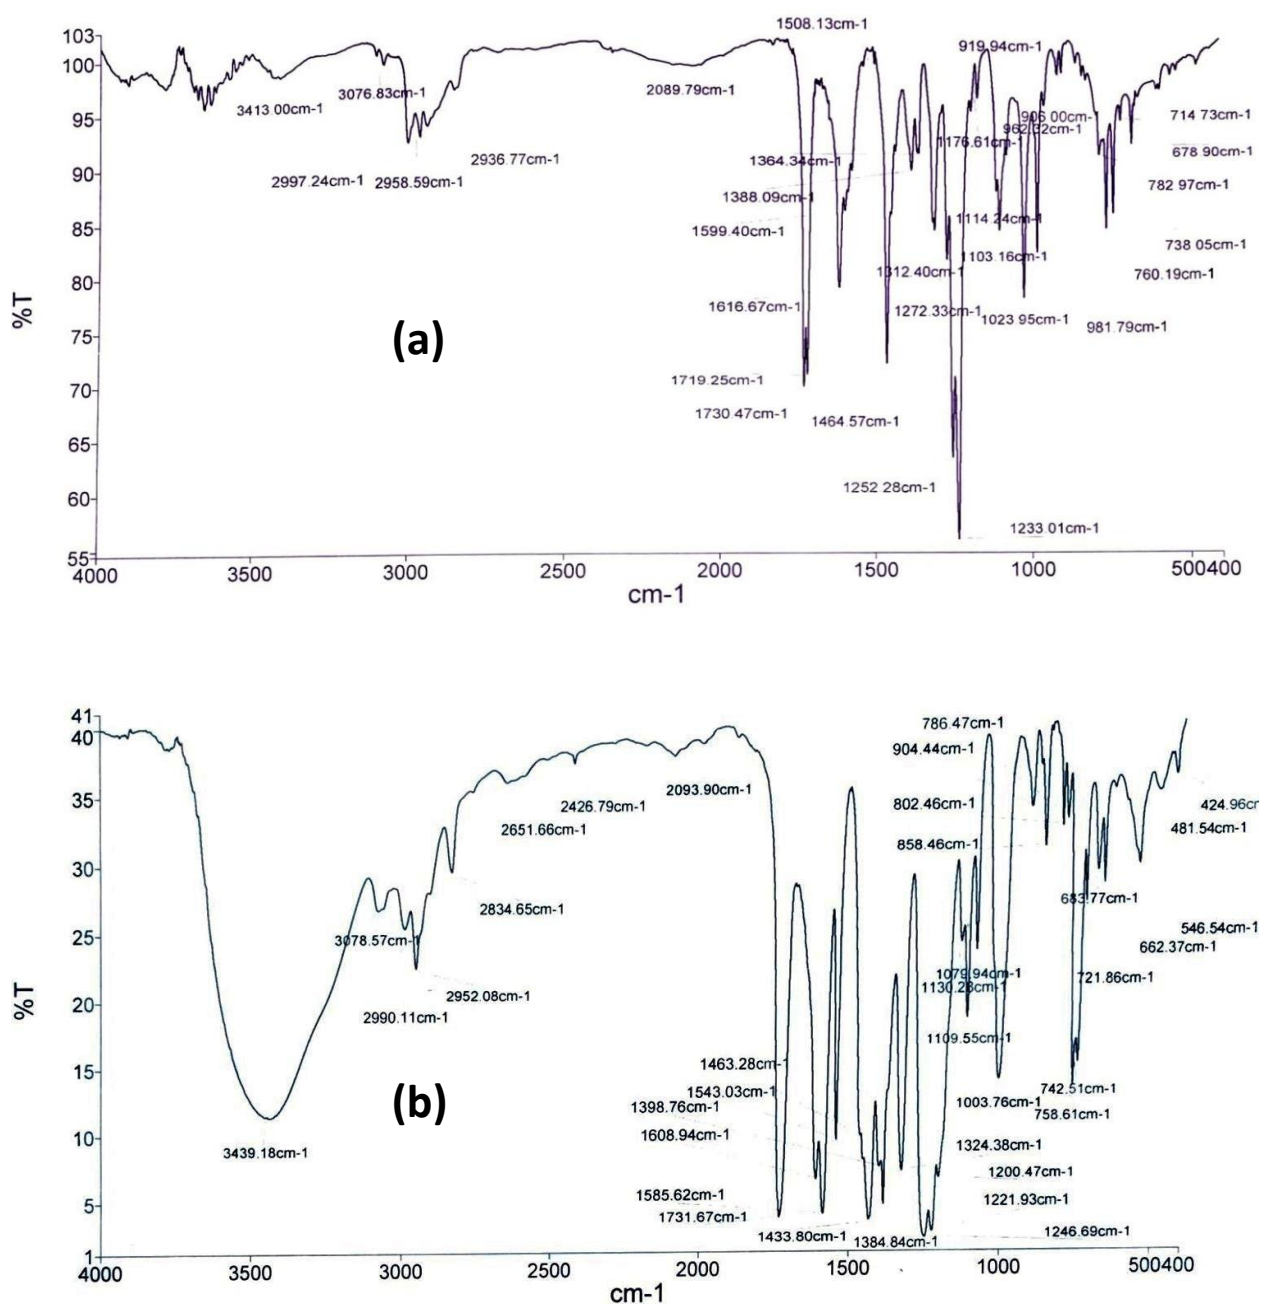

**Fig. S2** FT-IR spectra for (a) **HLA** and (b) **Complex A**. On comparing both, a significant shift in the vibration frequency associated with imine linkage from 1616 to 1608  $\text{cm}^{-1}$  has been noted while there was no significant change in frequency of band associated with ester linked  $>\text{C}=\text{O}$ . This indicated that imine linked N has involved in coordination bonding with metal ( $\text{Zn}^{\text{II}}$ ) thereby substantiating the formation of complex **A** from **HLA**.

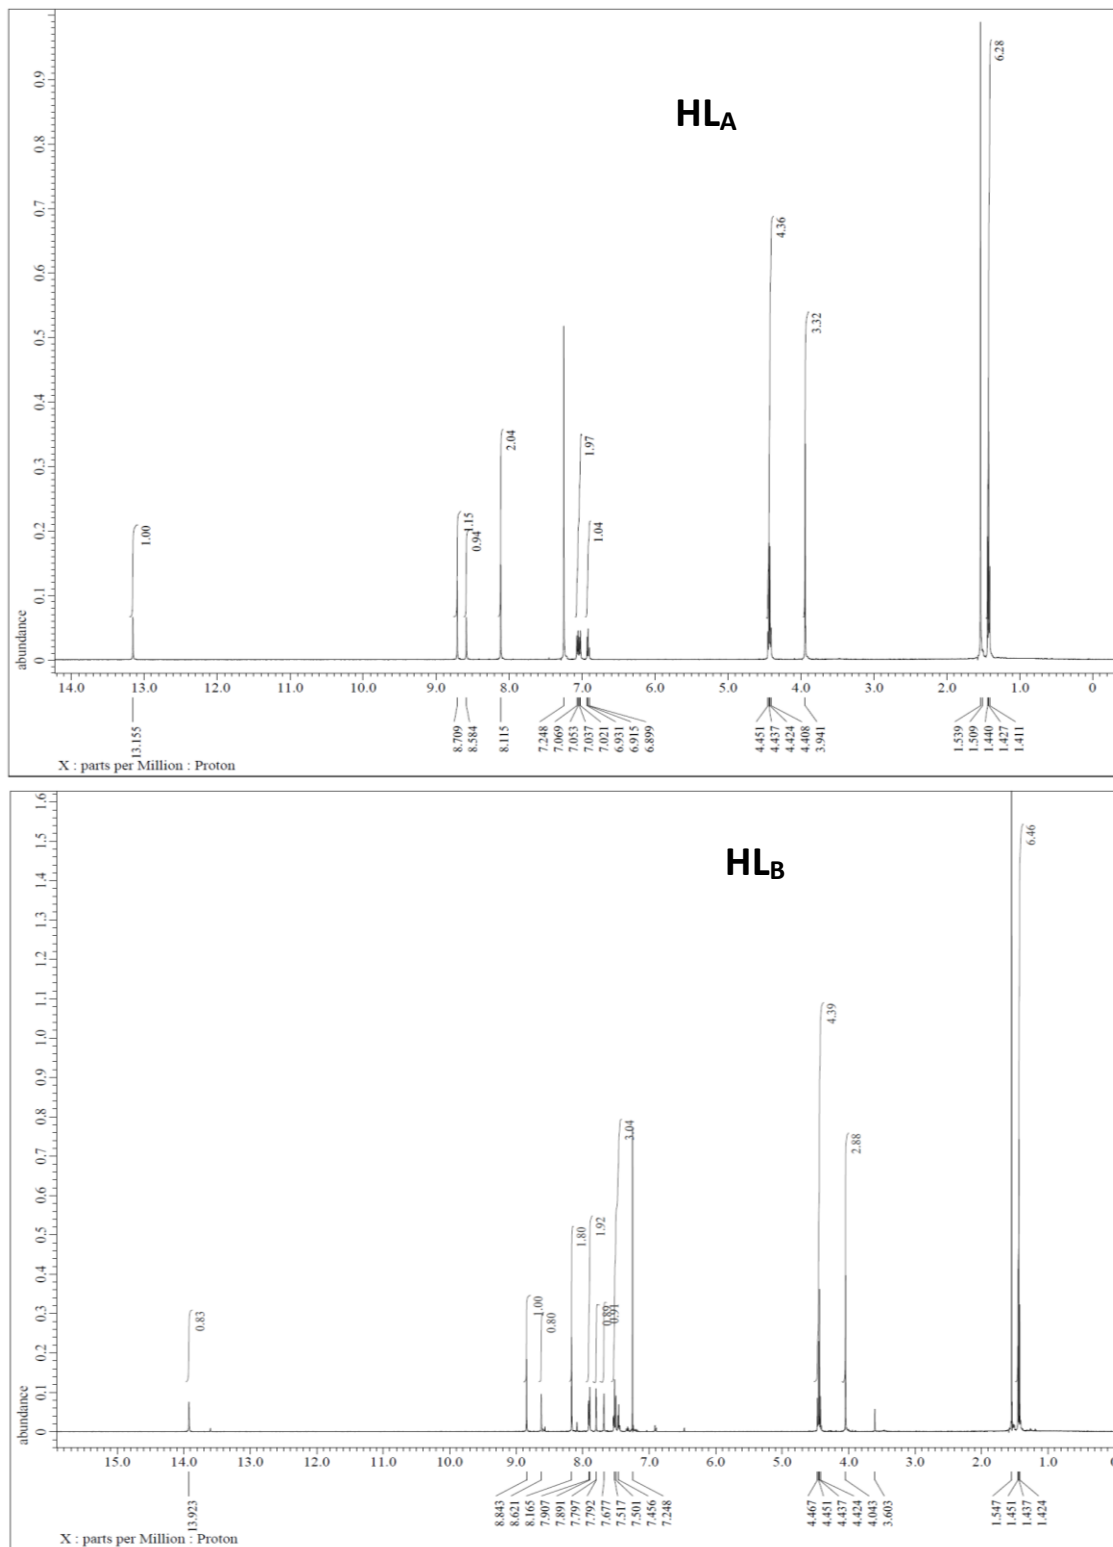

Fig. S3 <sup>1</sup>H-NMR spectra (in CDCl<sub>3</sub>) for (a) HLA and (b) HLB.

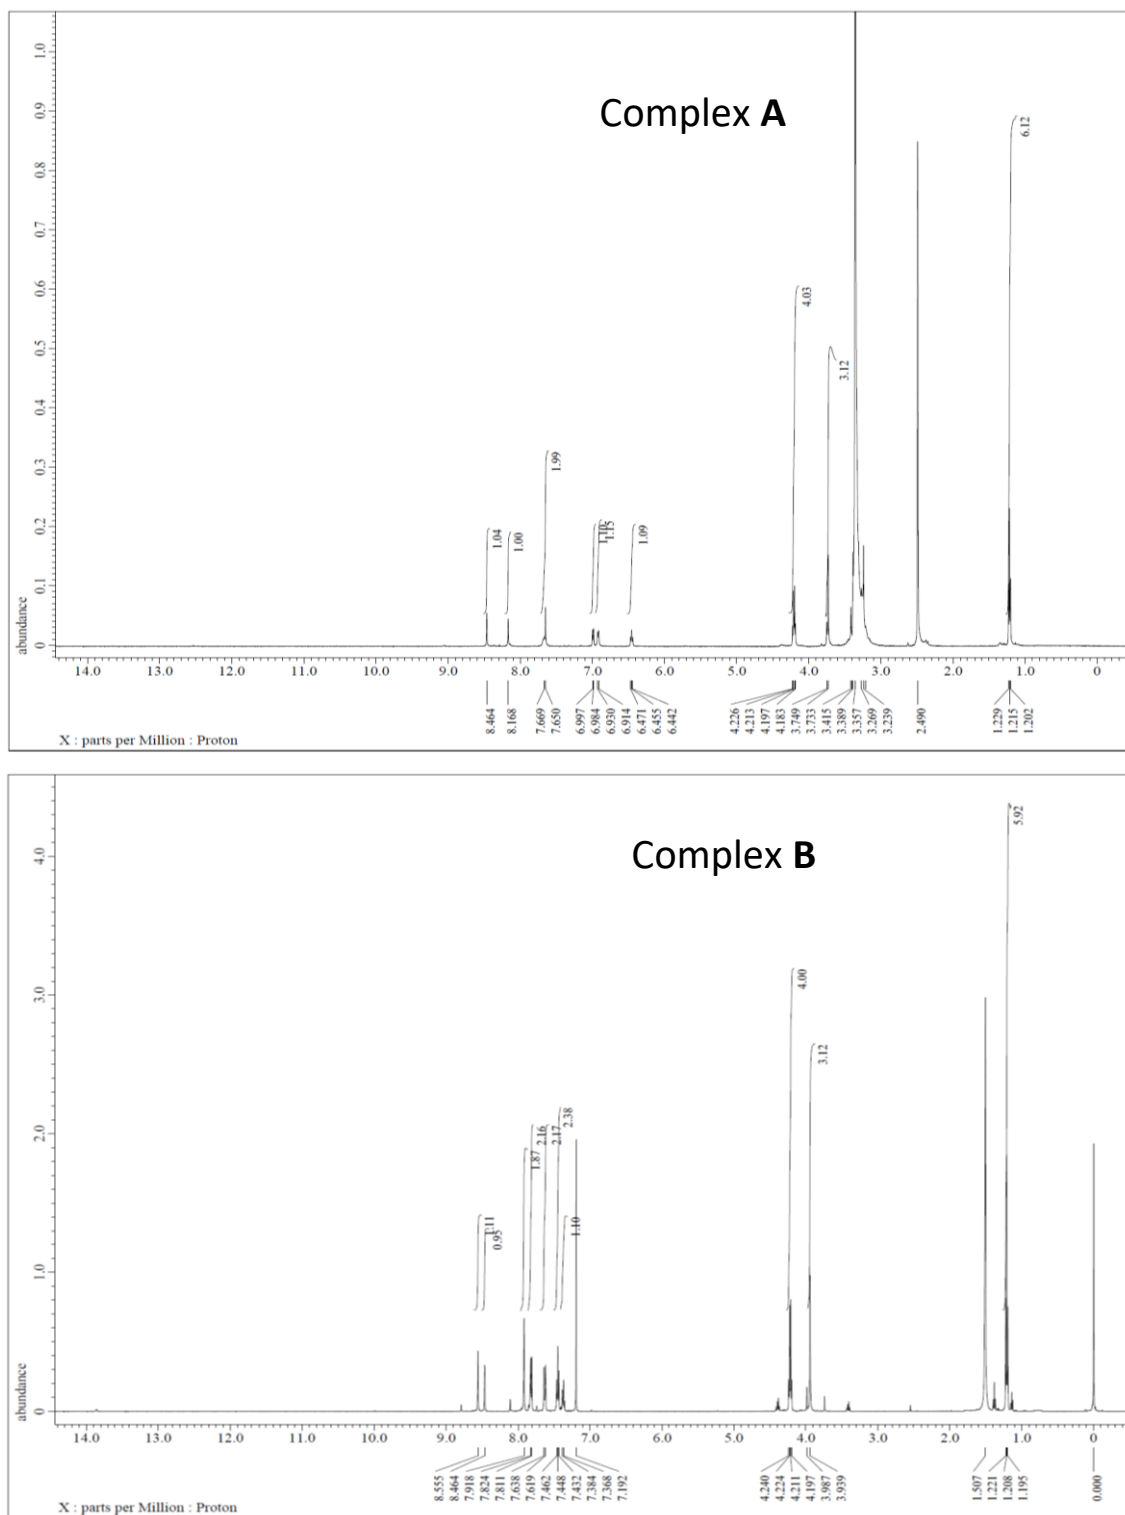

Fig. S4 <sup>1</sup>H-NMR spectra (in DMSO-d<sub>6</sub>) for (a) **A** [Zn<sup>II</sup>(L<sub>A</sub>)<sub>2</sub>] and (b) **B** [Zn<sup>II</sup>(L<sub>B</sub>)<sub>2</sub>].

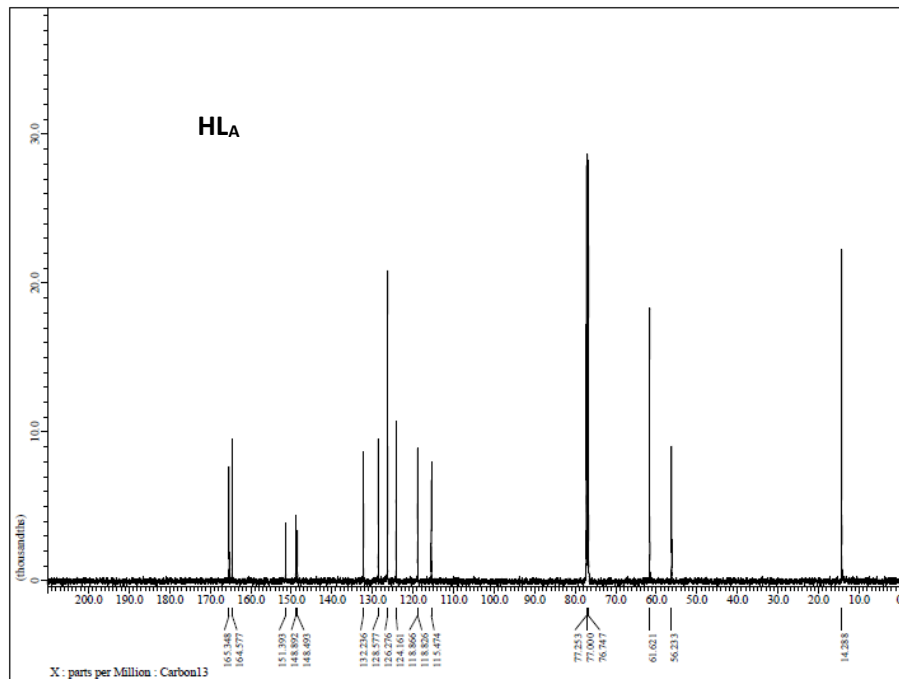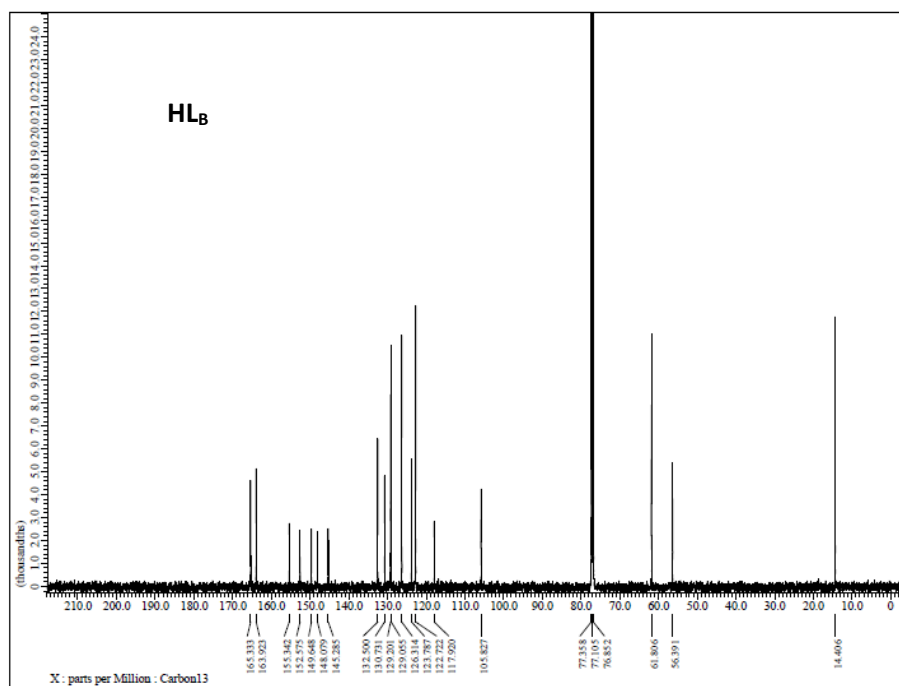

Fig. S5 <sup>13</sup>C-NMR spectra for HLA and HLB.

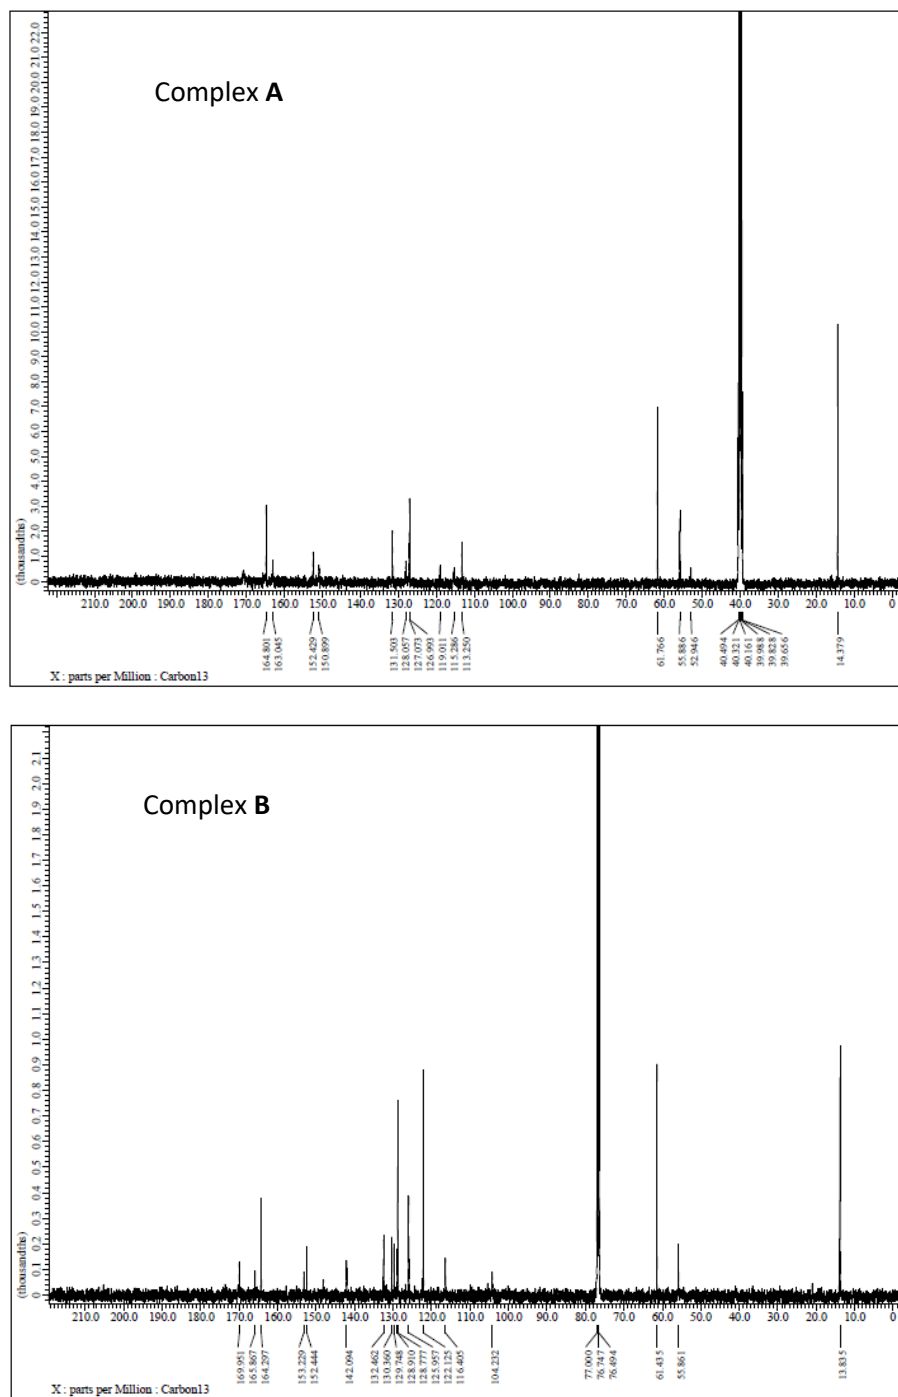

Fig. S6  $^{13}\text{C}$ -NMR spectra for complexes A and B.

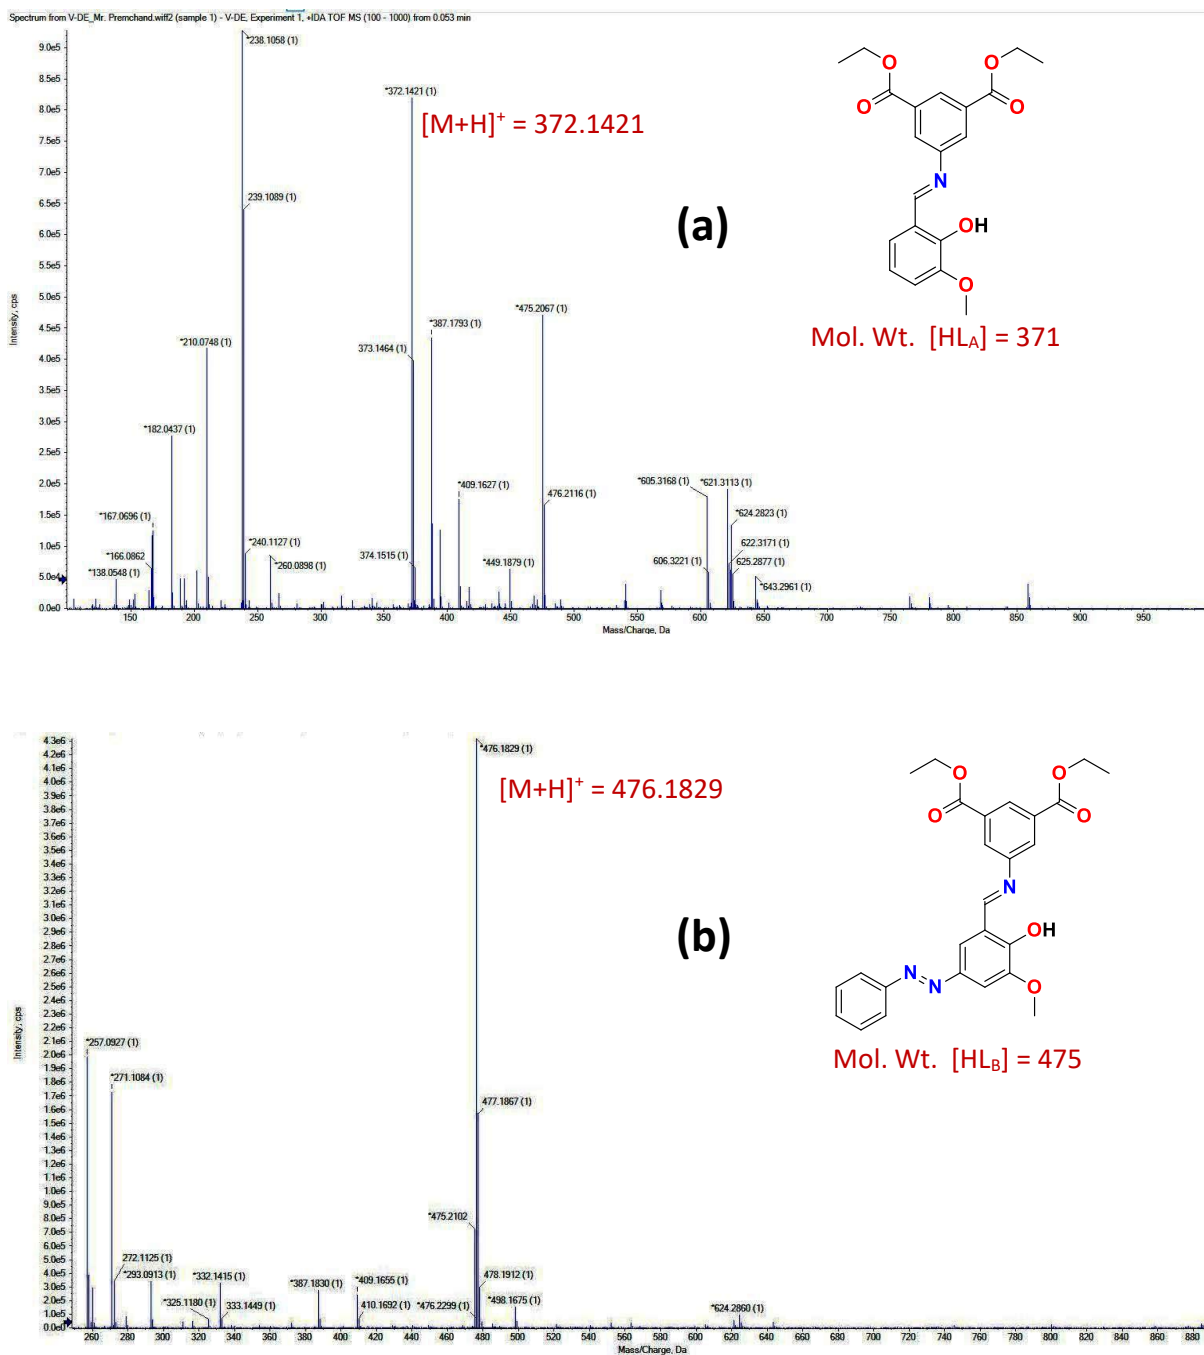

**Fig. S7** Mass (HRMS-QTOF) spectra obtained for (a) **HL<sub>A</sub>** and (b) **HL<sub>B</sub>** in positive mode. Molecular ion peaks were clearly observed with good relative intensity for both which signified the formulation for ligands as C<sub>20</sub>H<sub>21</sub>NO<sub>6</sub> and C<sub>26</sub>H<sub>25</sub>N<sub>3</sub>O<sub>6</sub>, respectively.



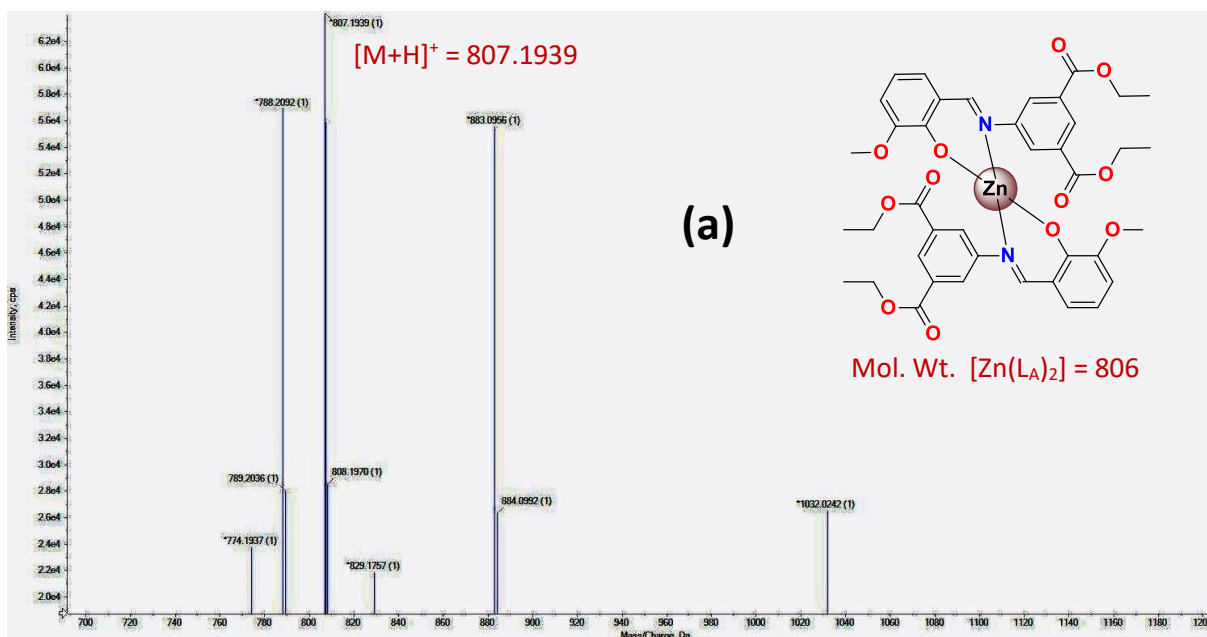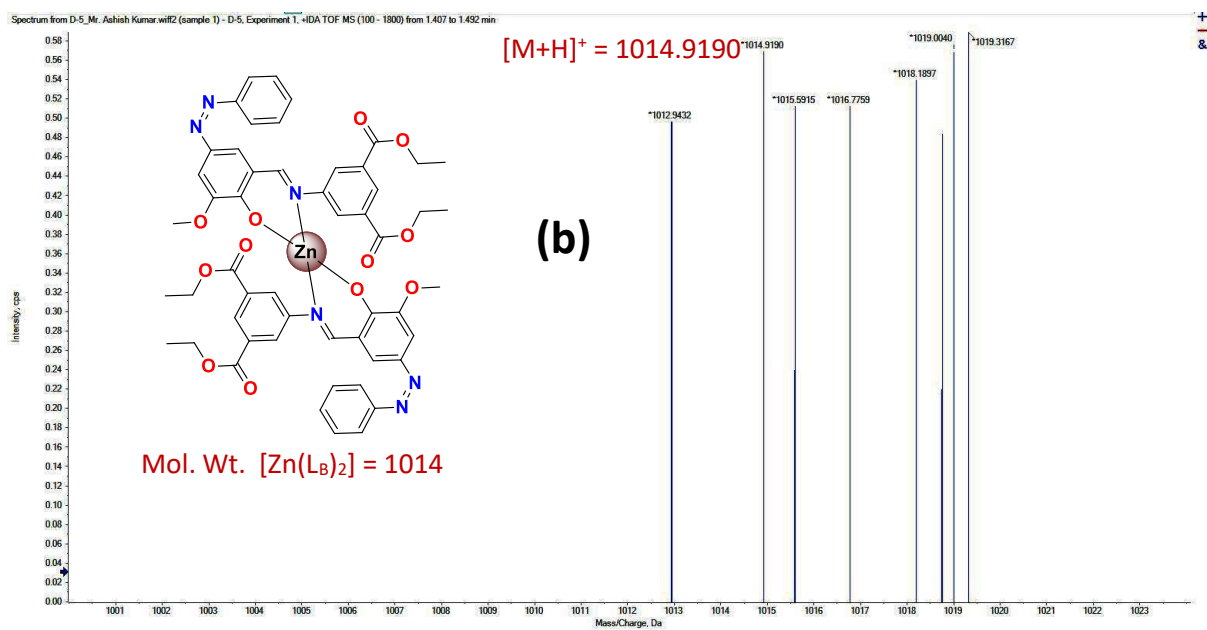

**Fig. S8** Mass (HRMS-QTOF) spectra obtained for (a) **A** and (b) **B** in positive mode. Existence of Molecular ion peaks signified their formulations as  $C_{40}H_{40}N_2O_{12}Zn$  and  $C_{52}H_{48}N_6O_{12}Zn$ , respectively.

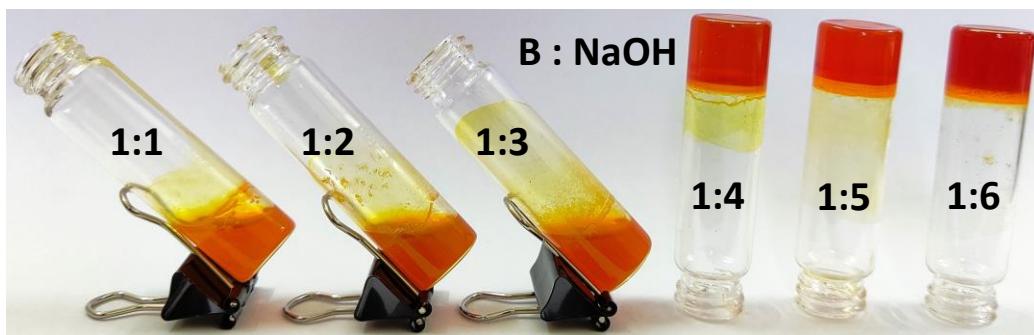

**Fig. S9** Gelation for **B** shown in presence of NaOH in different ratios i.e. from 1:1 to 1:6 equiv. and checked via inverted vial method. Appropriate gelation occurred in presence of  $\geq 4.0$  equiv. of NaOH.

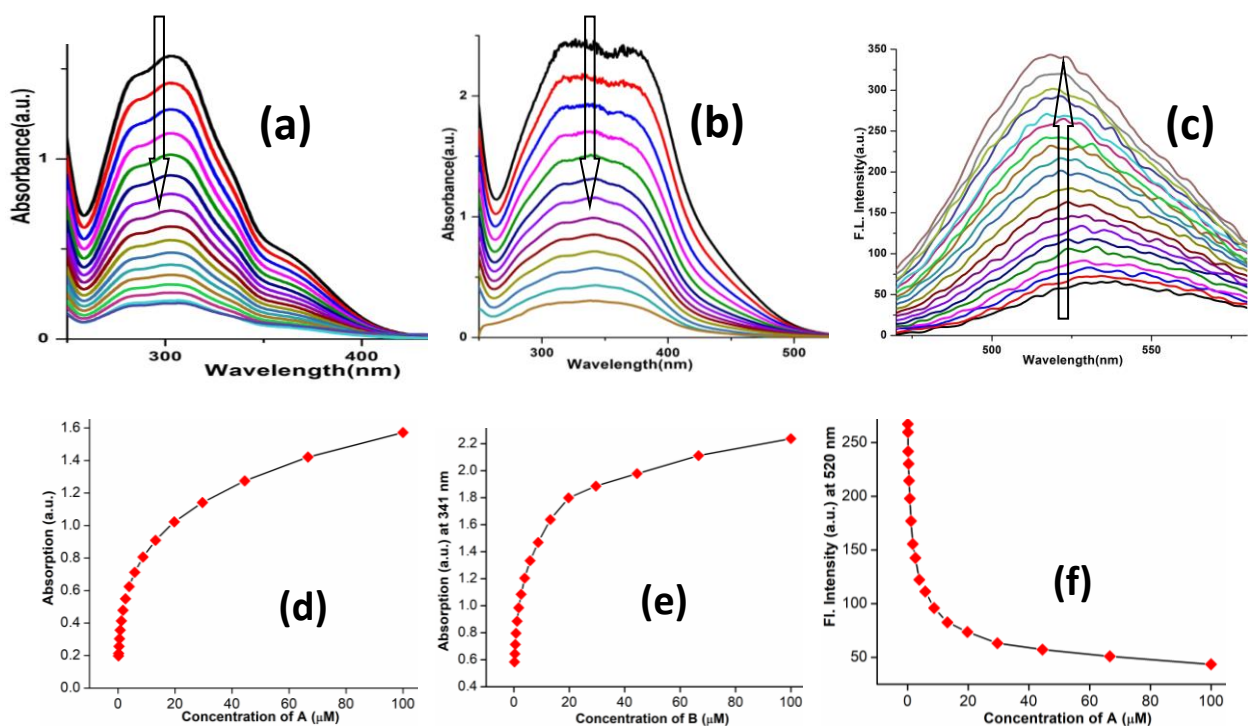

**Fig. S10** (a) UV-vis spectra recorded for showing absorbance for **A** and (b) **B** with decrease in concentration from  $10^{-4}$  to  $\sim 10^{-7}$  M called dilution experiments which is one of the basic optimization steps to determine permissible concentration of **A-B** to perform photophysical studies. (c) Similar optimization with dilution of **A** from  $10^{-4}$  to  $\sim 10^{-7}$  M concentration using fluorescence spectroscopy. (d), (e) and (f) display the plots for absorption and emission vs concentration for **A** and **B** at their characteristic wavelengths. (d) Absorbance at 302 nm for **A** (e) Absorbance at 341 nm for **B**. (f) Emission at 520 nm for **A**.

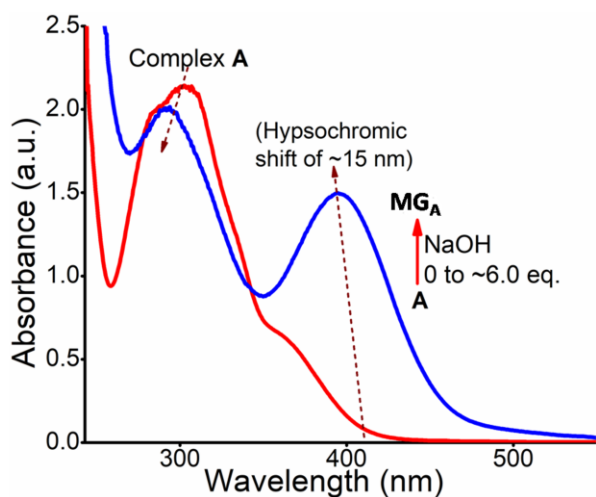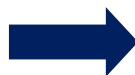

**Fig. S11** The first and the last spectra from the UV/vis titration graph for **A** vs NaOH showing significant hypso-chromic shift ( $\Delta\lambda$ ) of ~15 nm on reaching from  $\lambda$  (410 nm) to  $\lambda_{gel}$  (395 nm).

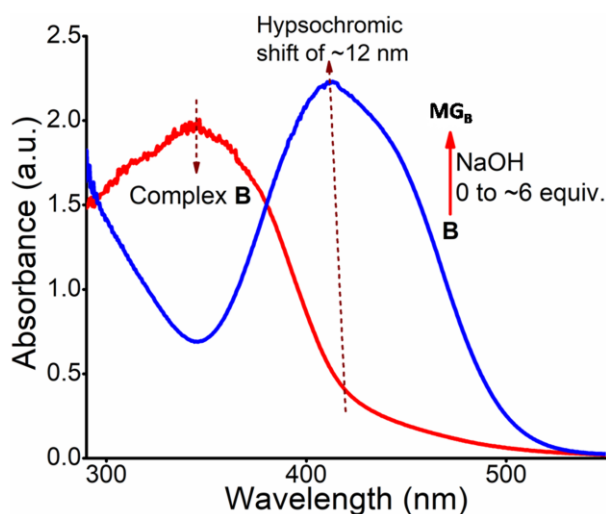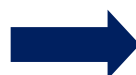

**Fig. S12** The first and the last spectra from the UV/vis titration graph for **B** vs NaOH showing significant hypso-chromic shift ( $\Delta\lambda$ ) of 25 nm on reaching from  $\lambda$  (~438 nm) to  $\lambda_{gel}$  (~413 nm).

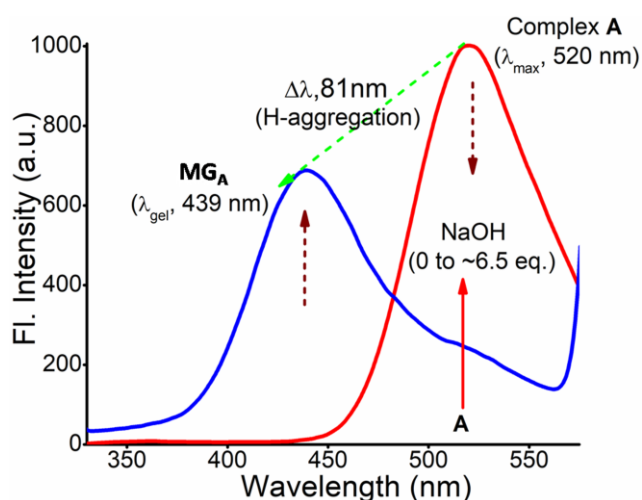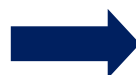

**Fig. S13** The first and the last spectra from the fluorescence titration graph for **A** vs NaOH showing significant hypso-chromic shift ( $\Delta\lambda$ ) of ~81 nm on reaching from  $\lambda_{max}$  (520 nm) to  $\lambda_{gel}$  (439 nm).

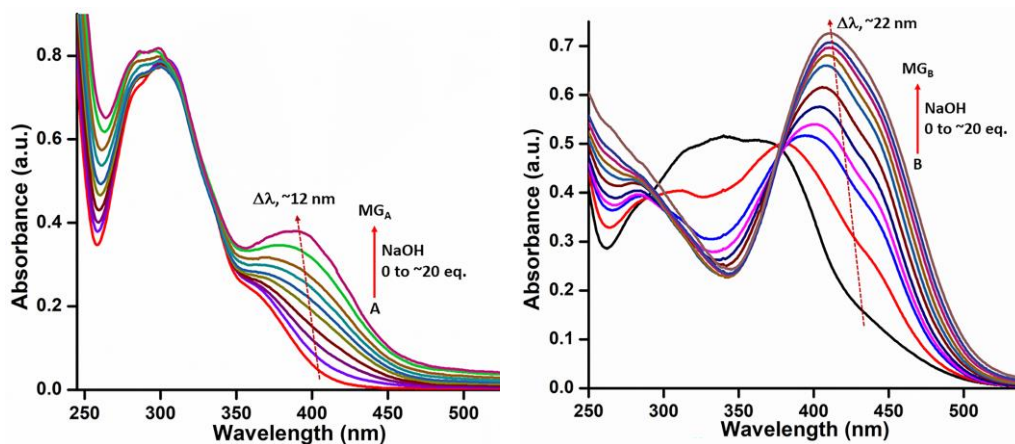

**Fig. S14** (a) UV-vis titration for **A** and (b) **B** at  $\sim 10^{-7}$  M concentration in presence of NaOH solution displaying similar hypsochromism with less absorbance.

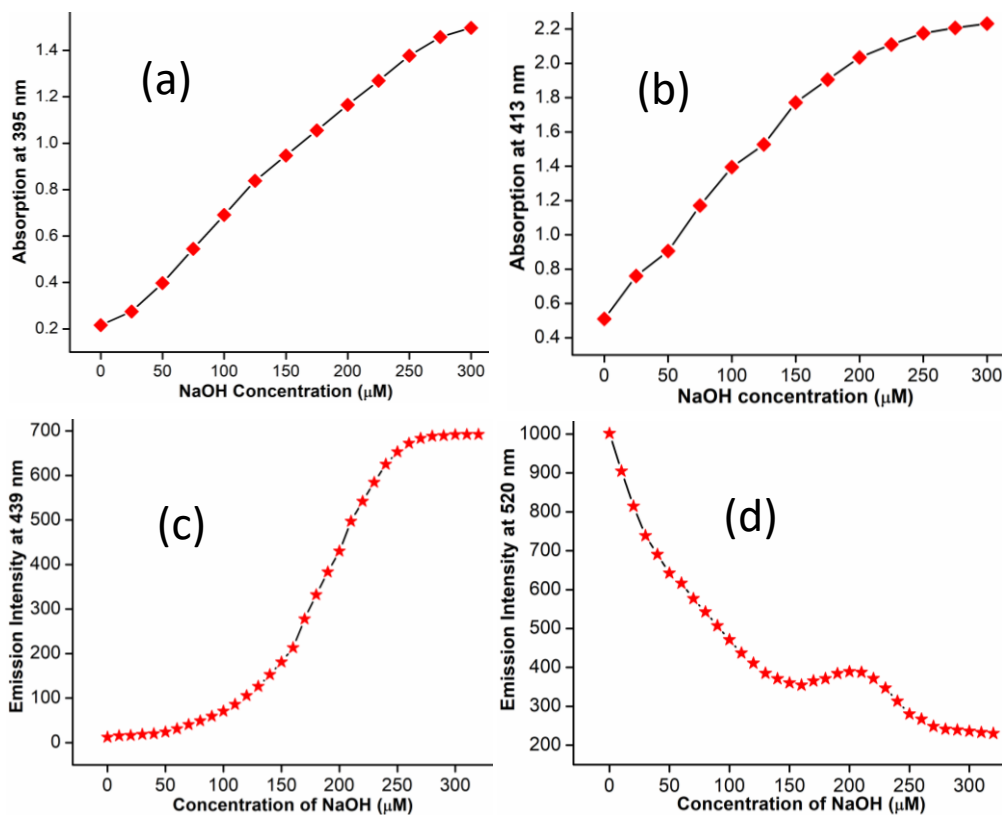

**Fig. S15** Additional plots for absorption and emission vs. NaOH concentration at particular wavelength showing (a) Variation of absorption at 395 nm for **A**. (b) Variation of absorption at 413 nm for **B**. (c) Variation of emission at 439 nm for **A** and (d) Variation of emission at 520 nm for **A**.

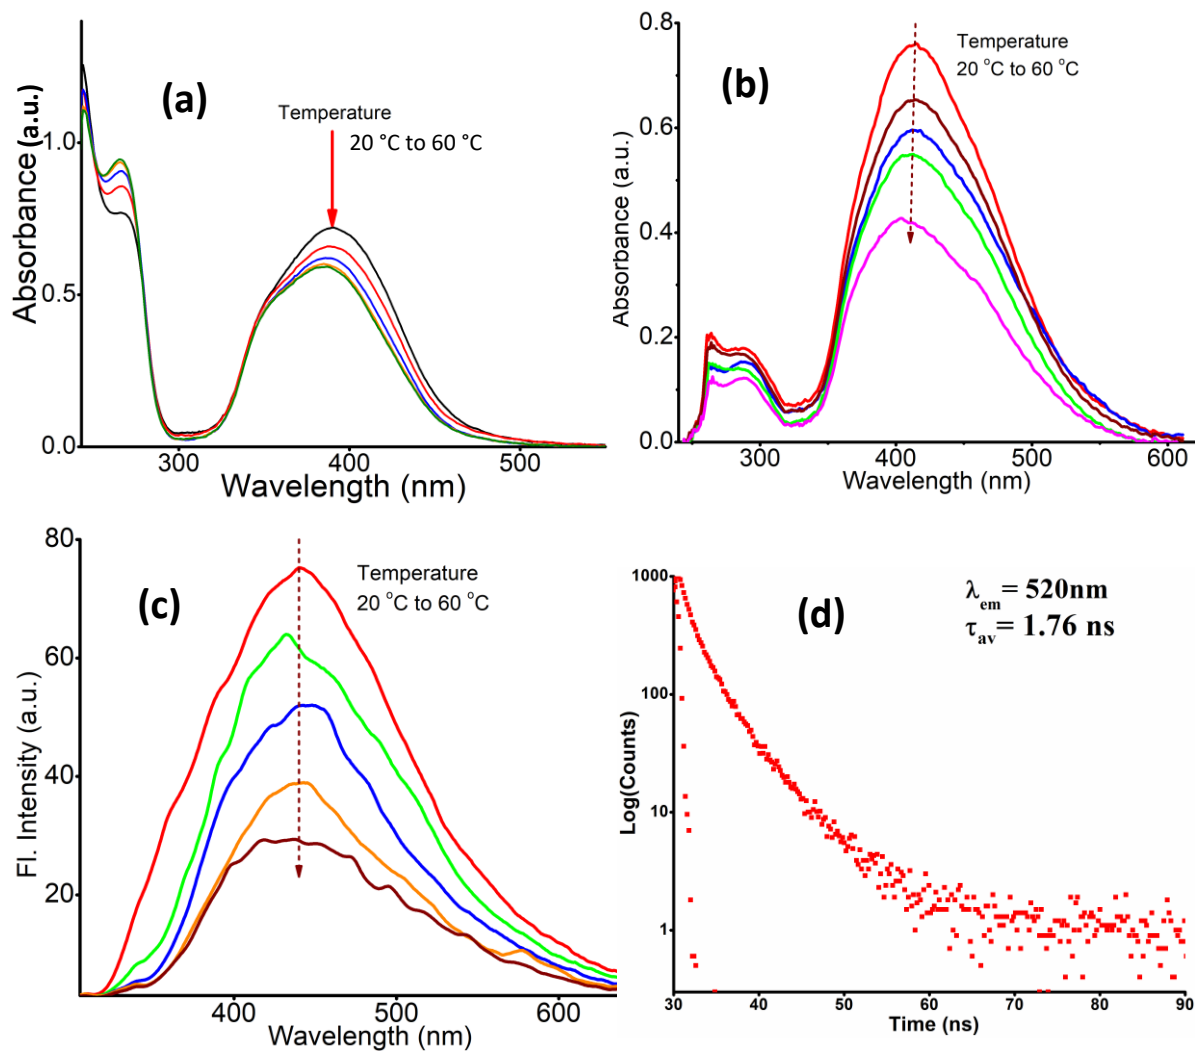

**Fig. S16** Temperature dependent UV-vis spectra for (a) **MG<sub>A</sub>** and (b) **MG<sub>B</sub>**. (c) Temperature dependent fluorescence spectra for **MG<sub>A</sub>**. (d) Fluorescence decay graph for complex **A**.

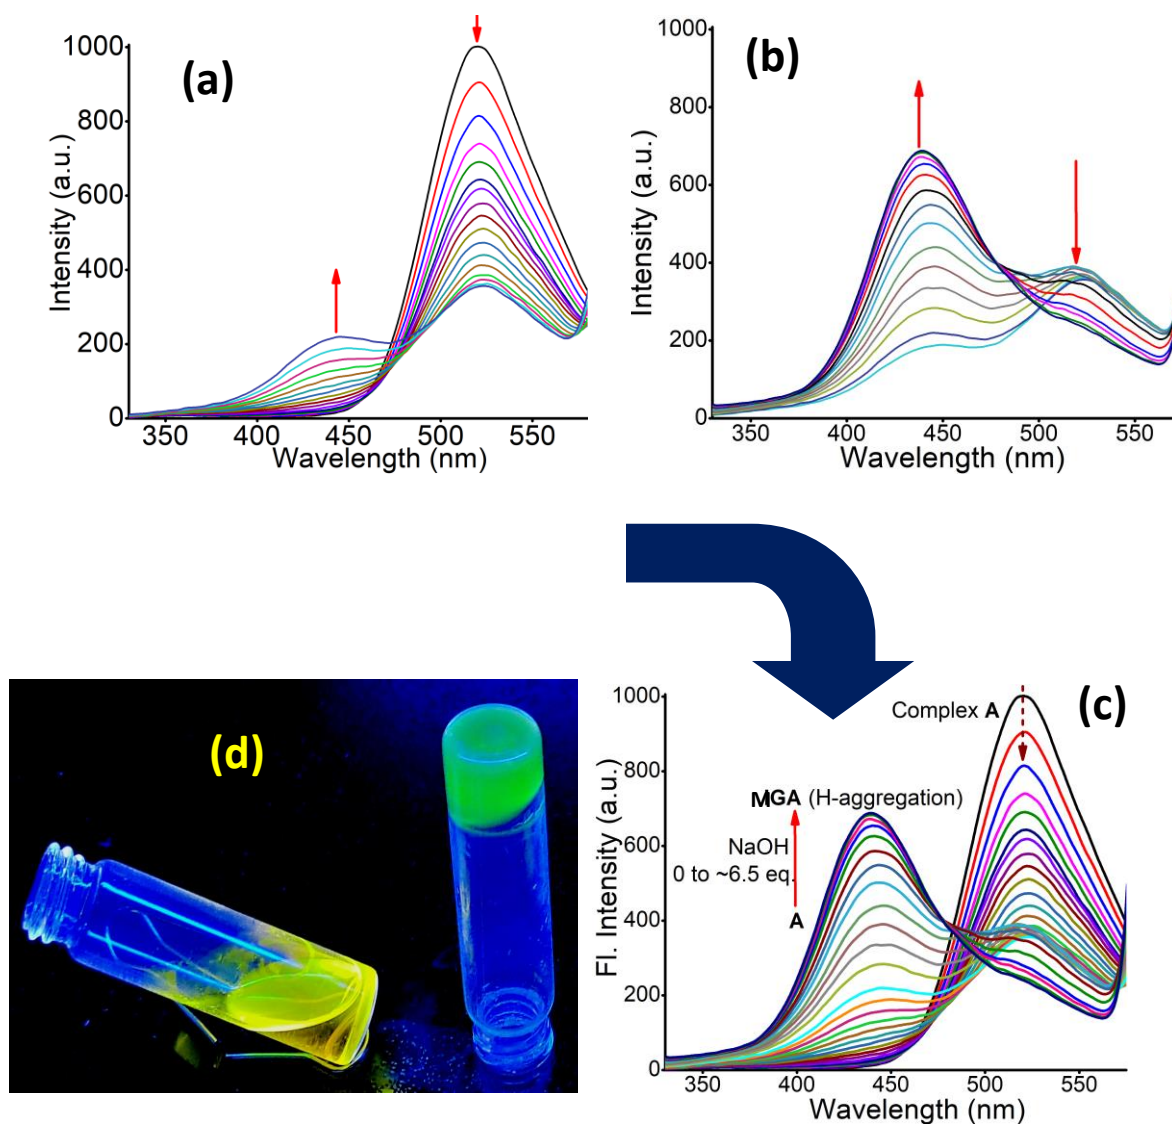

**Fig. S17** (a) First half of fluorescence titration for **A**+NaOH displaying conversion of esters into carboxylates. (b) Second half of fluorescence titration spectra for **A**+NaOH signifying the CT followed by aggregation. It substantiated that aggregation started to occur after a threshold conversion of **A** into **MGA** via conformational transformation called as AICT (c) Combined full titration spectra showing the gelation of **A**.

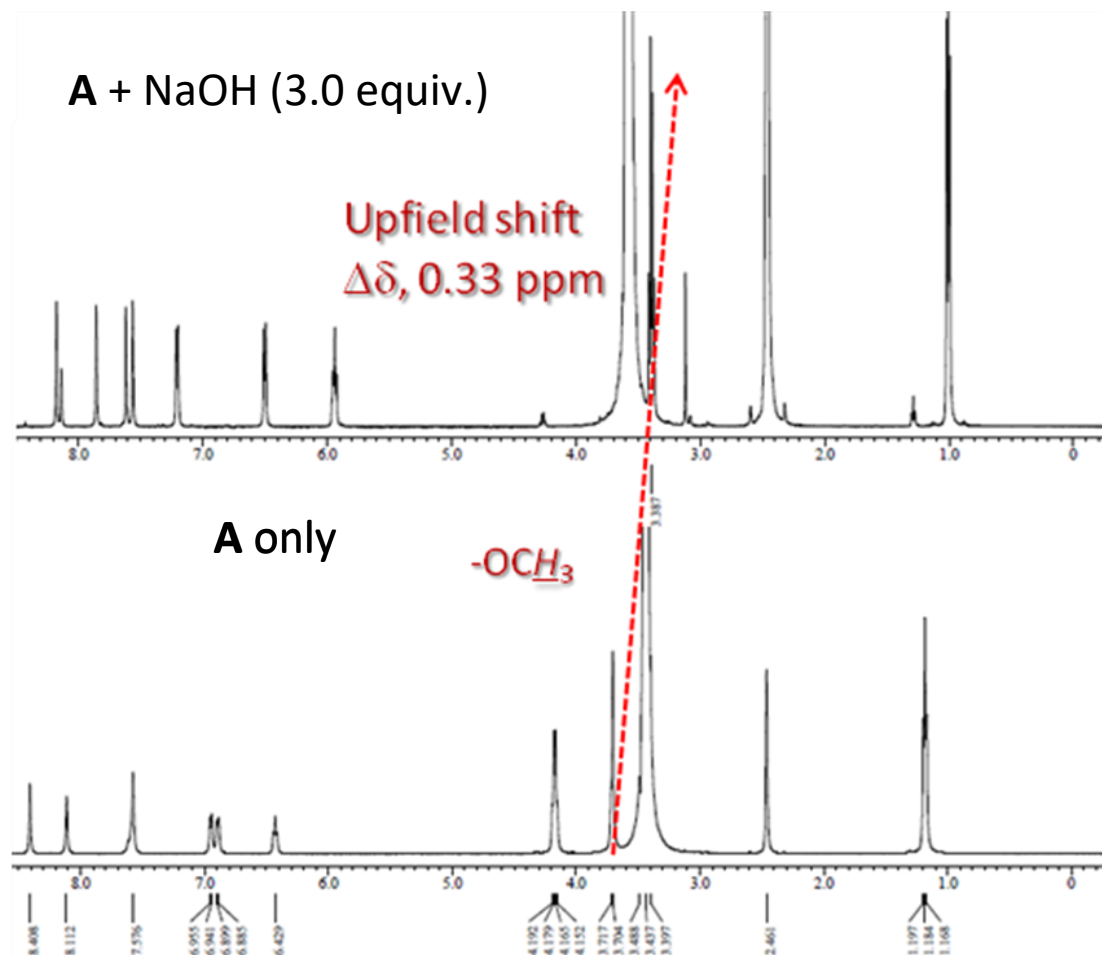

**Fig. S18** A portion from <sup>1</sup>H NMR titration spectra for **A** in presence of 3.0 equiv. of NaOH showing significant upfield shift of signal associated with  $-OCH_3$  proton ( $\Delta\delta, 0.33$  ppm). It is indicative of a significant conformational transformation induced in presence of NaOH as a result of ester to carboxylate conversion.

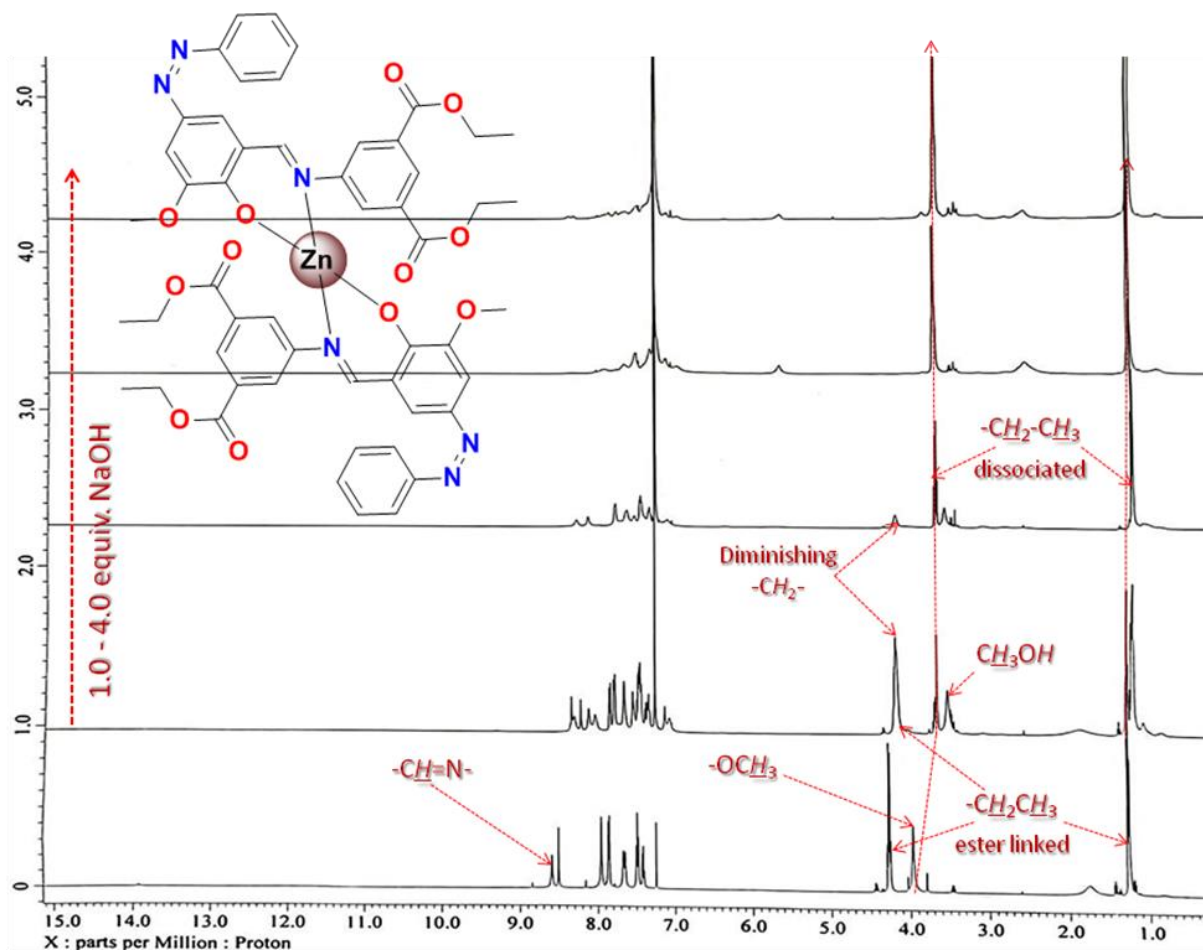

**Fig. S19**  $^1\text{H}$  NMR titration spectra for **B** ( $\text{CDCl}_3$ ) +  $\text{NaOH}$  ( $\text{CD}_3\text{OD}$ ; 0 - 4.0 equiv.). Similar changes were evident as observed for **A** +  $\text{NaOH}$  except that the signal for  $-\text{CH}=\text{N}-$  ( $\delta$ , 8.59 ppm) did not disappear (possibly due to  $\text{CDCl}_3$  bond did not break) but undergone upfield shifting and broadening those might be relevant for planar  $\pi$ -interactions.



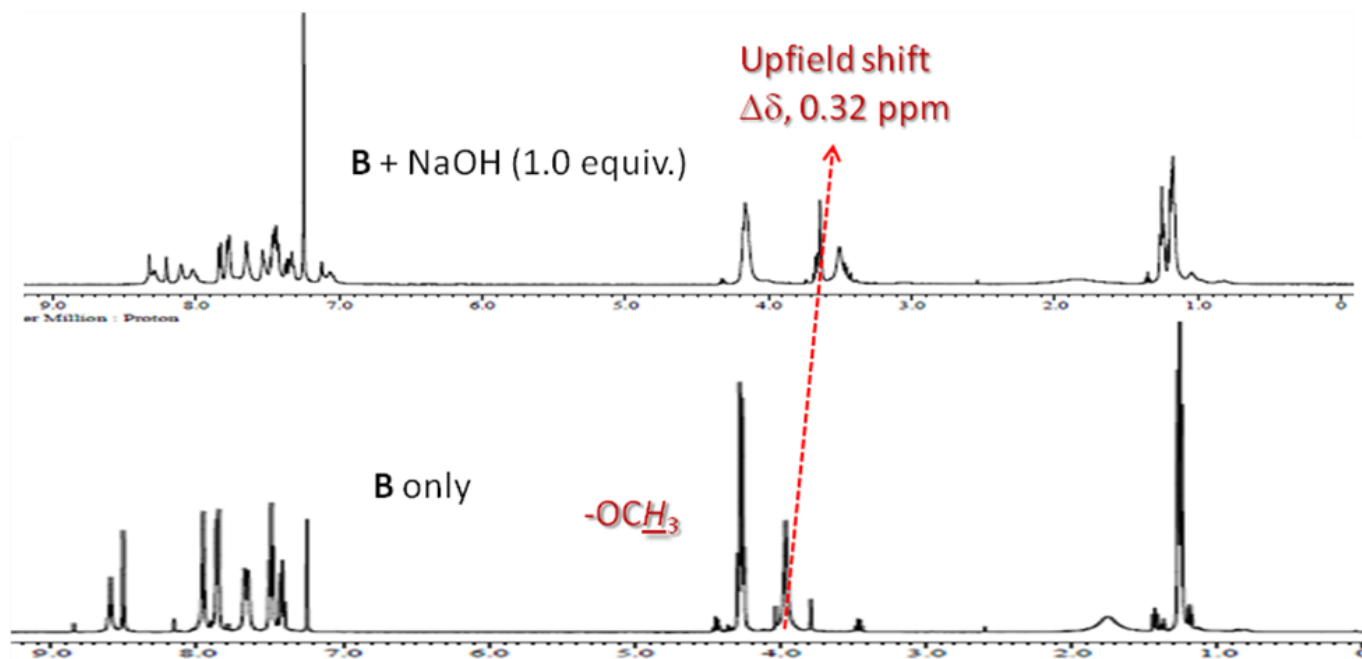

**Fig. S20** A portion from <sup>1</sup>H NMR titration spectra for **B** in presence of 1.0 equiv. of NaOH showing significant upfield shift of signal associated with  $-\text{OCH}_3$  proton ( $\Delta\delta$ , 0.32 ppm). It substantiated a significant tendency towards conformational transformations induced by NaOH as indicated for **A** + NaOH.

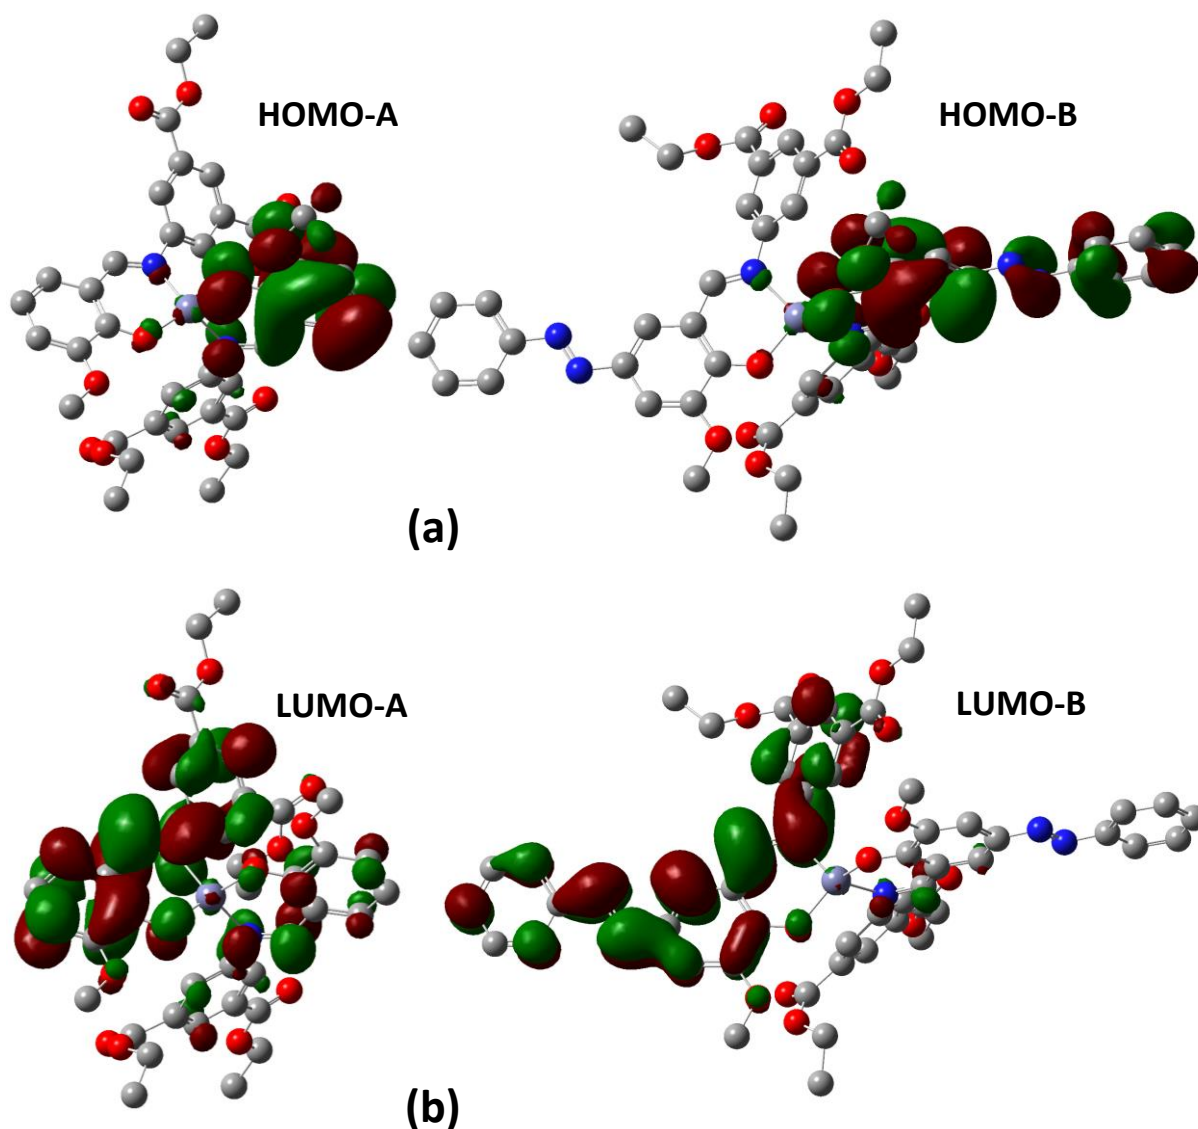

**Fig. S21** DFT optimized structures representing (a) HOMO of **A** (Left hand side) and **B** (Right hand side) and (b) LUMO of **A** (Left hand side) and **B** (Right hand side). The theoretically optimized structures exhibited  $t_d$  coordination geometry around  $Zn^{II}$ . It was observed that most of the electron density is localized mainly on the *o*-vanillin core (in **A**) and *p*-*a*-*p* (in **B**) suggesting that the electron density has preferred to stabilize away from metal centre which induced a charge separation and thereby dipole moment. It was considered as a key factor for induced gelation under saponification conditions.

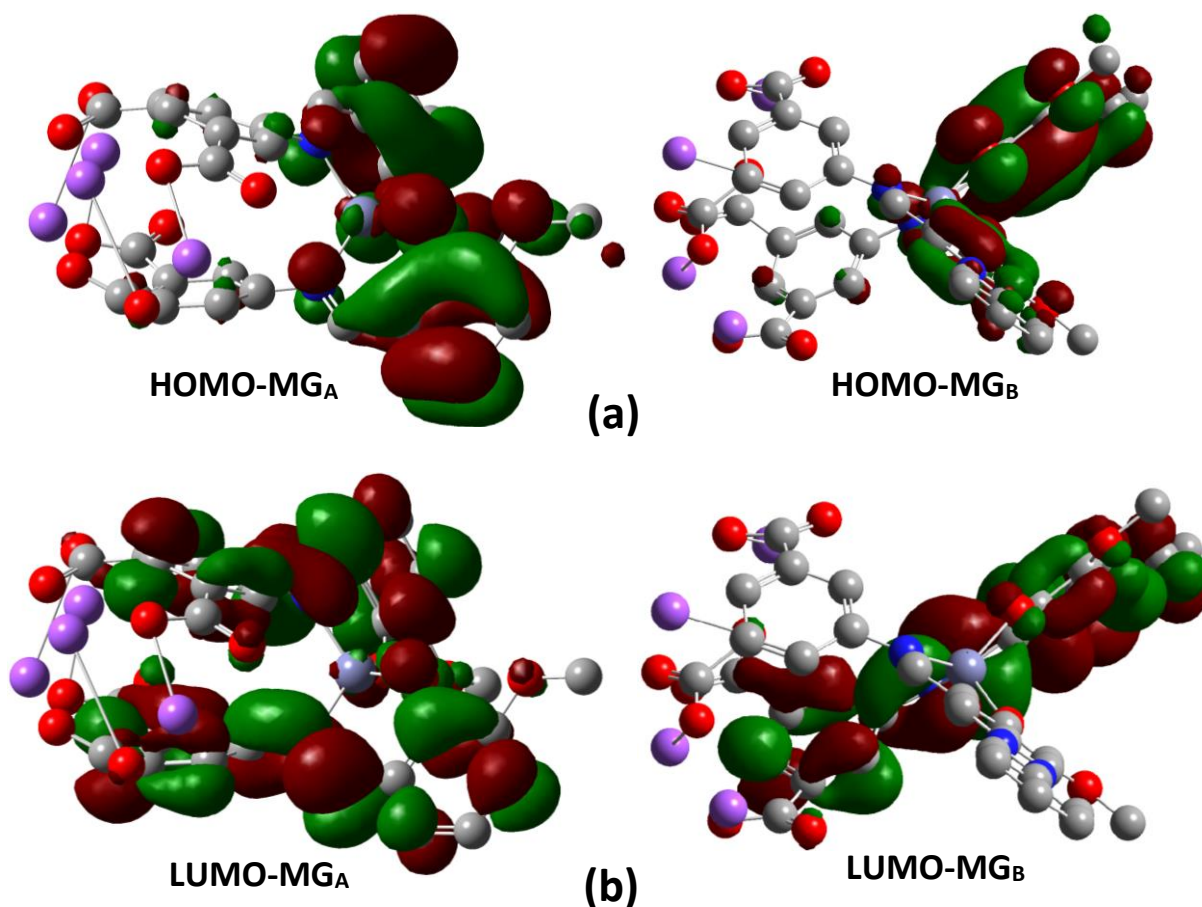

**Fig. S22** DFT optimized structures representing the progelators (a) HOMO of **MG<sub>A</sub>** (Left hand side) and **MG<sub>B</sub>** (Right hand side) and (b) LUMO of **MG<sub>A</sub>** (Left hand side) and **MG<sub>B</sub>** (Right hand side). These displayed similar  $t_d$  geometrical environment around the metal centre but entirely different from their parent complexes **A** and **B** in their conformational arrangements. Most of the  $e$ -den is localized on the *o*-vanillin core (**A**) and pap core (**B**) suggesting that  $e$ -den is stabilized away from the metal centre which consequently caused charge separation between the centre and the periphery. It has been considered as a key factor for gelation to take place under saponification induced conditions.

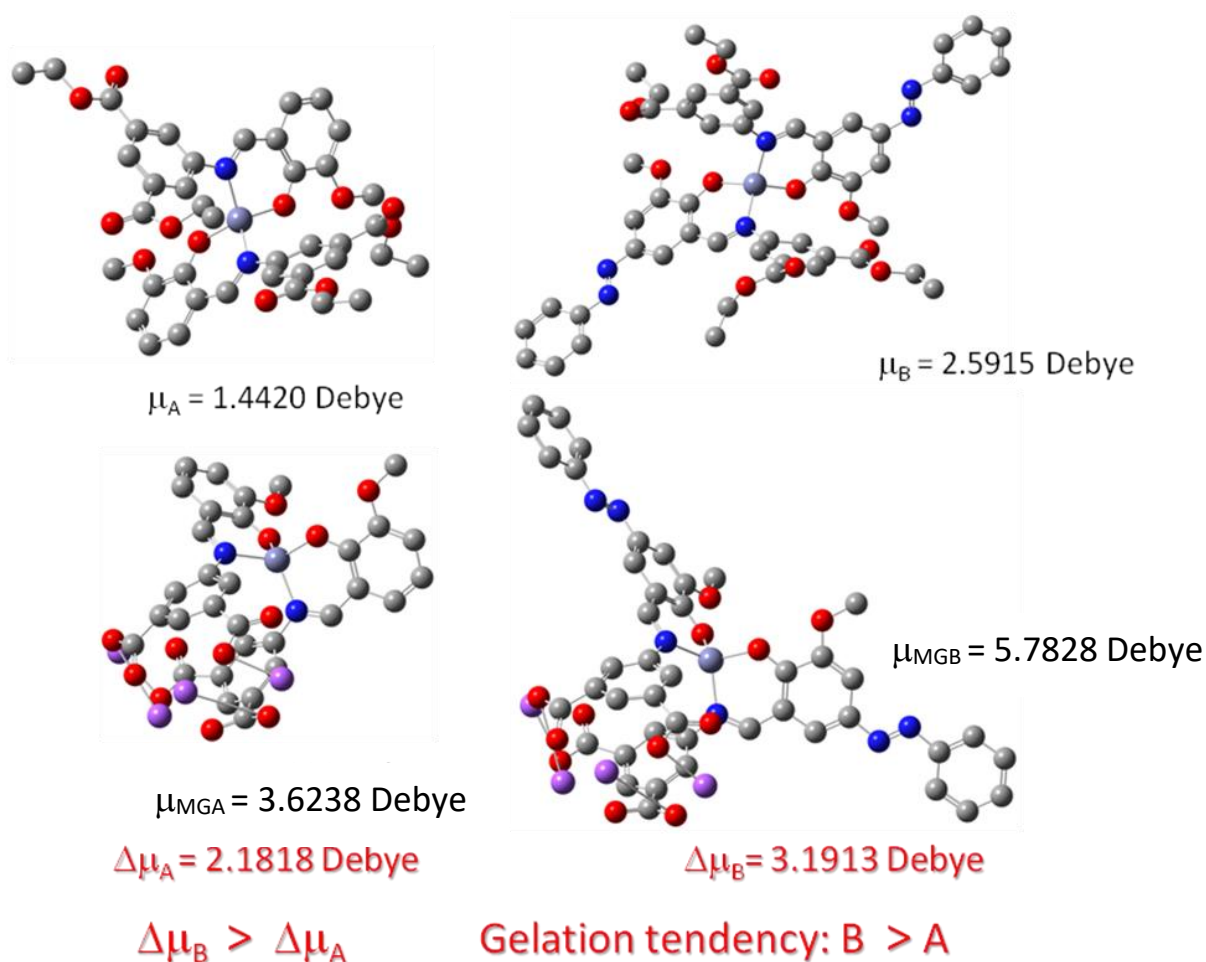

**Fig. S23** DFT optimized structures of **A-B** and **MG<sub>A</sub>-MG<sub>B</sub>** (hydrogens are omitted for clarity). Theoretical studies revealed that each couple of the complex (**A** and **B**) and corresponding saponified products (**MG<sub>A</sub>-MG<sub>B</sub>**) exhibits differences in dipole moments i.e. 2.18 and 3.19 Debye for **A-MG<sub>A</sub>** and **B-MG<sub>B</sub>** pairs, respectively. Therefore, it substantiated their comparative tendencies towards gelation as **B > A** which explained the fact why complex **A** took more time to undergo gelation as compared to **B**. This fact has also been reasoned by observing large (4.082 Å) and small (4.073 Å) centroid-centroid distances in **MG<sub>A</sub>** and **MG<sub>B</sub>**, respectively substantiating increasing gelation efficiency from **A** to **B**.

| Complex A          |                |       | Complex B          |                |       |
|--------------------|----------------|-------|--------------------|----------------|-------|
| File Name          | A1r            |       | File Name          | A2r            |       |
| File Type          | fch            |       | File Type          | fch            |       |
| Calculation Type   | FOPT           |       | Calculation Type   | FOPT           |       |
| Calculation Method | RB3LYP         |       | Calculation Method | RB3LYP         |       |
| Basis Set          | 6-31G(D,P)     |       | Basis Set          | 6-31G(D,P)     |       |
| Charge             | 0              |       | Charge             | 0              |       |
| Spin               | Singlet        |       | Spin               | Singlet        |       |
| Total Energy       | -4339.86166477 | a.u.  | Total Energy       | -5020.90334236 | a.u.  |
| RMS Gradient Norm  | 0.00000476     | a.u.  | RMS Gradient Norm  | 0.00000151     | a.u.  |
| Imaginary Freq     |                |       | Imaginary Freq     |                |       |
| Dipole Moment      | 1.4420         | Debye | Dipole Moment      | 2.5915         | Debye |

  

| MG <sub>A</sub>    |                |       | MG <sub>B</sub>    |                |       |
|--------------------|----------------|-------|--------------------|----------------|-------|
| File Name          | T1             |       | File Name          | k1             |       |
| File Type          | fch            |       | File Type          | fch            |       |
| Calculation Type   | FOPT           |       | Calculation Type   | FOPT           |       |
| Calculation Method | RB3LYP         |       | Calculation Method | RB3LYP         |       |
| Basis Set          | 6-31G(D,P)     |       | Basis Set          | 6-31G(D,P)     |       |
| Charge             | 0              |       | Charge             | 0              |       |
| Spin               | Singlet        |       | Spin               | Singlet        |       |
| Total Energy       | -4672.50179264 | a.u.  | Total Energy       | -5353.54857519 | a.u.  |
| RMS Gradient Norm  | 0.00000649     | a.u.  | RMS Gradient Norm  | 0.00000714     | a.u.  |
| Imaginary Freq     |                |       | Imaginary Freq     |                |       |
| Dipole Moment      | 3.6238         | Debye | Dipole Moment      | 5.7828         | Debye |

$$\Delta\mu (\text{MG}_A\text{-A}) = 2.18 \text{ Debye} \quad \Delta\mu (\text{MG}_B\text{-B}) = 3.19 \text{ Debye}$$

**Fig. S24** Result summaries obtained from DFT optimization for model structures of **A-B** and **MG<sub>A</sub>-MG<sub>B</sub>** showing their dipole moments. A substantial increase in dipole moment observed in the order  $\Delta\mu (\text{MG}_B\text{-B}) > \Delta\mu (\text{MG}_A\text{-A})$  indicated gelation efficiency for **B** > **A**.

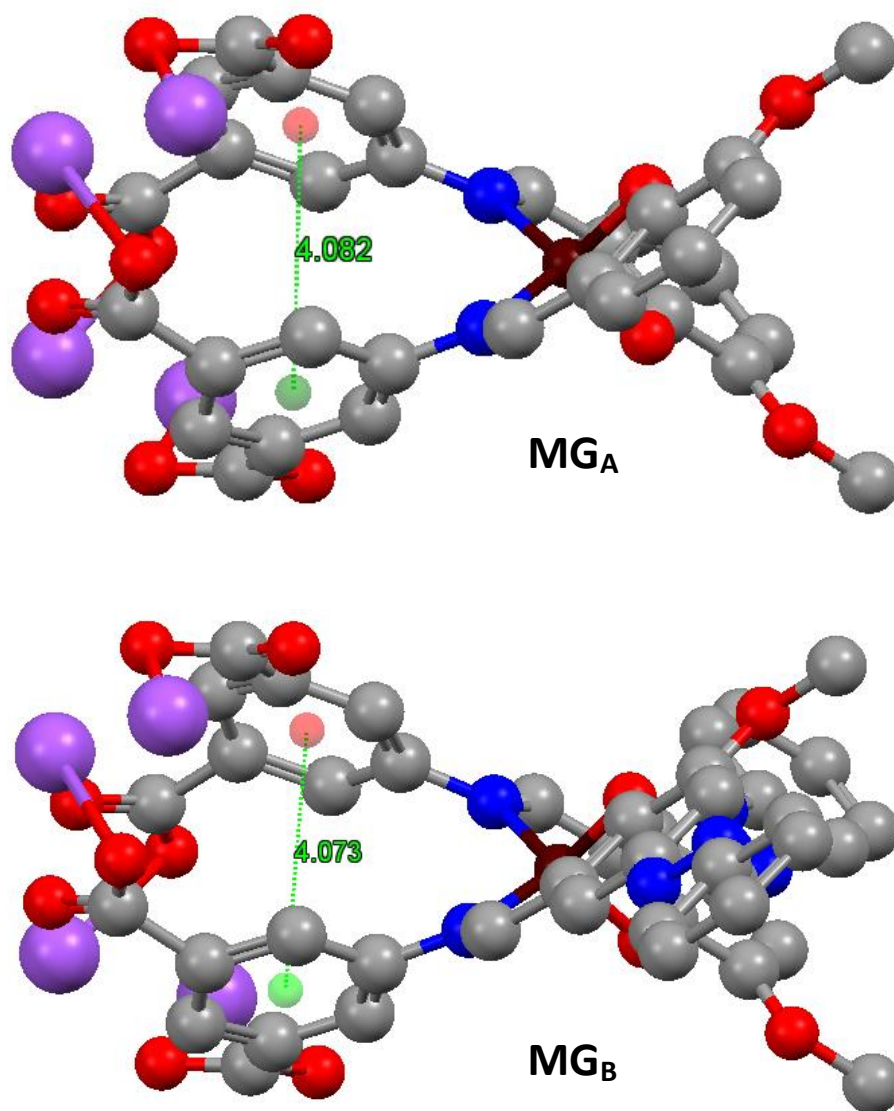

**Fig. S25** DFT optimized structures of **MG<sub>A</sub>-MG<sub>B</sub>** (hydrogens are omitted for clarity) to show the difference in centroid-centroid distances between the respective isophthalate rings.

**Table T1.** Crystal data and structure refinement for **HLB**.

|                                   |                                                               |                   |
|-----------------------------------|---------------------------------------------------------------|-------------------|
| Identification code               | shelxl                                                        |                   |
| Empirical formula                 | C <sub>26</sub> H <sub>25</sub> N <sub>3</sub> O <sub>6</sub> |                   |
| Formula weight                    | 951.010                                                       |                   |
| Temperature                       | 293(2) K                                                      |                   |
| Wavelength                        | 0.71073 Å                                                     |                   |
| Crystal system                    | Triclinic                                                     |                   |
| Space group                       | <i>P</i> -1                                                   |                   |
| Unit cell dimensions              | a = 7.52118 (14) Å                                            | α = 62.200 (2)°   |
|                                   | b = 19.1168 (4) Å                                             | β = 80.9796 (15)° |
|                                   | c = 19.7439 (4) Å                                             | γ = 87.5397 (16)° |
| Volume                            | 2478.6 (1) Å <sup>3</sup>                                     |                   |
| Z                                 | 2                                                             |                   |
| Density (calculated)              | 1.274 g/cm <sup>3</sup>                                       |                   |
| Absorption coefficient (μ)        | 0.092 mm <sup>-1</sup>                                        |                   |
| F(000)                            | 1000                                                          |                   |
| Crystal size                      | 0.20 x 0.10 x 0.05 mm <sup>3</sup>                            |                   |
| Theta range for data collection   | 2.04 to 25.00°.                                               |                   |
| Reflections collected             | 71966                                                         |                   |
| Independent reflections           | 8723 [R(int) = 0.0311]                                        |                   |
| Data completeness                 | 1.000                                                         |                   |
| Absorption correction             | Semi-empirical from equivalents                               |                   |
| Max. and min. transmission        | 0.989 and 0.995                                               |                   |
| Refinement method                 | Full-matrix least-squares on F <sup>2</sup>                   |                   |
| Data / restraints / parameters    | 8723 / 357 / 796                                              |                   |
| Goodness-of-fit on F <sup>2</sup> | 1.0566                                                        |                   |
| Final R indices [I > 2σ(I)]       | R1 = 0.0619, wR2 = 0.1920                                     |                   |
| R indices (all data)              | R1 = 0.0948, wR2 = 0.2175                                     |                   |
| Largest peak and deepest hole     | 0.7678 and -0.2667 e.Å <sup>-3</sup>                          |                   |

**Table T2.** Selected bond lengths [ $\text{\AA}$ ] and bond angles [ $^\circ$ ] for **HLB**.

| Atom | Atom | Length/ $\text{\AA}$ | Atom | Atom | Length/ $\text{\AA}$ | Atom | Atom | Length/ $\text{\AA}$ |
|------|------|----------------------|------|------|----------------------|------|------|----------------------|
| C1   | C2   | 1.383(3)             | C15  | C16  | 1.414(3)             | N2   | C18  | 1.434(3)             |
| C1   | C6   | 1.386(3)             | C16  | C17  | 1.368(3)             | N3   | C21  | 1.439(3)             |
| C2   | C3   | 1.383(3)             | C17  | C18  | 1.396(3)             | O1   | C7   | 1.326(3)             |
| C2   | C7   | 1.489(3)             | C18  | C19  | 1.371(3)             | O1   | C8   | 1.460(3)             |
| C3   | C4   | 1.387(3)             | C21  | C22  | 1.383(4)             | O2   | C7   | 1.206(3)             |
| C4   | C5   | 1.391(3)             | C21  | C26  | 1.369(3)             | O3   | C10  | 1.323(3)             |
| C5   | C6   | 1.387(3)             | C22  | C23  | 1.385(4)             | O3   | C11  | 1.458(3)             |
| C6   | C10  | 1.490(3)             | C23  | C24  | 1.367(4)             | O4   | C10  | 1.190(3)             |
| C8   | C9   | 1.475(4)             | C24  | C25  | 1.368(4)             | O5   | C16  | 1.363(3)             |
| C11  | C12  | 1.405(5)             | C25  | C26  | 1.369(4)             | O5   | C20  | 1.423(3)             |
| C13  | C14  | 1.440(3)             | N1   | C4   | 1.419(3)             | O6   | C15  | 1.334(3)             |
| C14  | C15  | 1.401(3)             | N1   | C13  | 1.273(3)             |      |      |                      |
| C14  | C19  | 1.391(3)             | N2   | N3   | 1.241(3)             |      |      |                      |

| Atom | Atom | Atom | Angle/ $^\circ$ | Atom | Atom | Atom | Angle/ $^\circ$ |
|------|------|------|-----------------|------|------|------|-----------------|
| C1   | C6   | C10  | 118.4(2)        | C22  | C21  | C26  | 120.1(2)        |
| C1   | C2   | C3   | 119.6(2)        | C23  | C24  | C25  | 119.3(3)        |
| C1   | C6   | C5   | 120.4(2)        | C24  | C25  | C26  | 120.7(3)        |
| C1   | C2   | C7   | 122.8(2)        | N1   | C13  | C14  | 122.4(2)        |
| C2   | C3   | C4   | 121.2(2)        | N1   | C4   | C3   | 116.3(2)        |
| C2   | C1   | C6   | 119.8(2)        | N1   | C4   | C5   | 124.8(2)        |
| C3   | C4   | C5   | 118.9(2)        | N2   | C18  | C17  | 125.0(2)        |
| C3   | C2   | C7   | 117.6(2)        | N2   | C18  | C19  | 115.0(2)        |
| C4   | N1   | C13  | 123.2(2)        | N2   | N3   | C21  | 112.8(2)        |
| C4   | C5   | C6   | 120.0(2)        | N3   | N2   | C18  | 114.2(2)        |
| C5   | C6   | C10  | 121.2(2)        | N3   | C21  | C22  | 123.8(2)        |
| C7   | O1   | C8   | 116.07(19)      | N3   | C21  | C26  | 116.1(2)        |
| C10  | O3   | C11  | 117.3(2)        | O1   | C7   | C2   | 113.5(2)        |
| C13  | C14  | C15  | 121.0(2)        | O1   | C8   | C9   | 108.4(2)        |
| C13  | C14  | C19  | 120.1(2)        | O1   | C7   | O2   | 123.0(2)        |
| C14  | C15  | C16  | 119.6(2)        | O2   | C7   | C2   | 123.5(2)        |
| C14  | C19  | C18  | 121.2(2)        | O3   | C11  | C12  | 109.3(3)        |
| C15  | C16  | C17  | 120.0(2)        | O3   | C10  | C6   | 112.2(2)        |
| C15  | C14  | C19  | 118.9(2)        | O3   | C10  | O4   | 123.6(2)        |
| C16  | C17  | C18  | 120.2(2)        | O4   | C10  | C6   | 124.1(2)        |
| C16  | O5   | C20  | 118.2(2)        | O5   | C16  | C15  | 114.1(2)        |
| C17  | C18  | C19  | 120.0(2)        | O5   | C16  | C17  | 125.8(2)        |
| C21  | C22  | C23  | 118.6(3)        | O6   | C15  | C14  | 122.2(2)        |
| C21  | C26  | C25  | 120.2(3)        | O6   | C15  | C16  | 118.3(2)        |
| C22  | C23  | C24  | 121.1(3)        |      |      |      |                 |



**Table T3.** Crystal data and structure refinement for Complex **B**.

|                                   |                                                                   |                  |  |
|-----------------------------------|-------------------------------------------------------------------|------------------|--|
| Identification code               | shelxl                                                            |                  |  |
| Empirical formula                 | C <sub>52</sub> H <sub>48</sub> N <sub>6</sub> O <sub>12</sub> Zn |                  |  |
| Formula weight                    | 1012.26                                                           |                  |  |
| Temperature                       | 293 (2) K                                                         |                  |  |
| Wavelength                        | 0.71073 Å                                                         |                  |  |
| Crystal system                    | Triclinic                                                         |                  |  |
| Space group                       | P -1                                                              |                  |  |
| Unit cell dimensions              | a = 15.0993 (2) Å                                                 | α = 100.281 (2)° |  |
|                                   | b = 17.6129 (4) Å                                                 | β = 90.399 (2)°  |  |
|                                   | c = 20.3424 (5) Å                                                 | γ = 102.672 (2)° |  |
| Volume                            | 5187.4 (2) Å <sup>3</sup>                                         |                  |  |
| Z                                 | 4                                                                 |                  |  |
| Density (calculated)              | 1.299 g/cm <sup>3</sup>                                           |                  |  |
| Absorption coefficient            | 0.539 mm <sup>-1</sup>                                            |                  |  |
| F(000)                            | 2112                                                              |                  |  |
| Crystal size                      | 0.30 x 0.15 x 0.08 mm <sup>3</sup>                                |                  |  |
| Theta range for data collection   | 2.397 to 23.000°.                                                 |                  |  |
| Reflections collected             | 120591                                                            |                  |  |
| Independent reflections           | 14424 [R(int) = 0.0582]                                           |                  |  |
| Data completeness                 | 0.998                                                             |                  |  |
| Absorption correction             | Semi-empirical from equivalents                                   |                  |  |
| Refinement method                 | Full-matrix least-squares on F <sup>2</sup>                       |                  |  |
| Data / restraints / parameters    | 14424 / 455 / 1444                                                |                  |  |
| Goodness-of-fit on F <sup>2</sup> | 1.0150                                                            |                  |  |
| Final R indices [I>2sigma(I)]     | R1 = 0.0607                                                       |                  |  |
| R indices (all data)              | R1 = 0.0995, wR2 = 0.1935                                         |                  |  |
| Largest diff. peak and hole       | 0.7100 and -0.4200 e.Å <sup>-3</sup>                              |                  |  |

**Table T4.** Selected bond lengths [ $\text{\AA}$ ] and bond angles [ $^\circ$ ] for Complex **B**.

| Atom | Atom | Length/ $\text{\AA}$ |
|------|------|----------------------|------|------|----------------------|------|------|----------------------|------|------|----------------------|
| C1   | C2   | 1.400(6)             | C15  | O5   | 1.294(5)             | C32  | C27  | 1.389(6)             | C44  | N5   | 1.427(6)             |
| C1   | C6   | 1.382(6)             | C16  | C15  | 1.433(6)             | C32  | C31  | 1.378(7)             | C46  | O12  | 1.434(6)             |
| C1   | N1   | 1.418(5)             | C16  | O6   | 1.359(5)             | C33  | O7   | 1.186(7)             | C47  | C52  | 1.362(8)             |
| C3   | C2   | 1.378(6)             | C17  | C16  | 1.370(6)             | C33  | O8   | 1.325(8)             | C47  | N6   | 1.462(7)             |
| C3   | C4   | 1.373(6)             | C17  | C18  | 1.403(7)             | C34  | O8   | 1.471(9)             | C48  | C47  | 1.360(8)             |
| C3   | C7   | 1.497(7)             | C18  | N2   | 1.421(6)             | C35  | C34  | 1.140(14)            | C48  | C49  | 1.376(9)             |
| C4   | C5   | 1.390(6)             | C19  | C14  | 1.426(6)             | C36  | C31  | 1.493(8)             | C50  | C49  | 1.340(10)            |
| C5   | C6   | 1.384(6)             | C19  | C18  | 1.354(7)             | C36  | O10  | 1.311(7)             | C50  | C51  | 1.366(10)            |
| C7   | O1   | 1.206(6)             | C20  | O6   | 1.423(6)             | C36  | O9   | 1.215(7)             | C51  | C52  | 1.374(8)             |
| C7   | O2   | 1.312(6)             | C22  | C21  | 1.324(10)            | C37  | C38  | 1.454(9)             | O11  | Zn1  | 1.917(3)             |
| C8   | O2   | 1.457(6)             | C23  | C22  | 1.415(10)            | C37  | O10  | 1.458(7)             | O5   | Zn1  | 1.912(3)             |
| C9   | C8   | 1.437(10)            | C24  | C23  | 1.284(14)            | C39  | C40  | 1.425(6)             | N1   | Zn1  | 2.009(3)             |
| C10  | C5   | 1.486(7)             | C25  | C24  | 1.353(14)            | C40  | C45  | 1.419(6)             | N3   | C21  | 1.442(7)             |
| C10  | O3   | 1.205(6)             | C25  | C26  | 1.419(12)            | C41  | C40  | 1.399(6)             | N3   | N2   | 1.250(6)             |
| C10  | O4   | 1.306(6)             | C26  | C21  | 1.370(10)            | C41  | O11  | 1.302(5)             | N4   | C27  | 1.439(6)             |
| C11  | O4   | 1.456(7)             | C28  | C27  | 1.383(6)             | C42  | C41  | 1.429(6)             | N4   | C39  | 1.303(5)             |
| C12  | C11  | 1.418(10)            | C29  | C28  | 1.379(7)             | C42  | C43  | 1.382(6)             | N4   | Zn1  | 2.012(4)             |
| C13  | N1   | 1.303(5)             | C29  | C30  | 1.374(7)             | C42  | O12  | 1.360(6)             | N6   | N5   | 1.231(6)             |
| C14  | C13  | 1.419(6)             | C29  | C33  | 1.484(8)             | C44  | C43  | 1.393(7)             |      |      |                      |
| C14  | C15  | 1.418(6)             | C30  | C31  | 1.380(7)             | C44  | C45  | 1.346(7)             |      |      |                      |

| Atom | Atom | Atom | Angle/ $^\circ$ | Atom | Atom | Atom | Angle/ $^\circ$ | Atom | Atom | Atom | Angle/ $^\circ$ |
|------|------|------|-----------------|------|------|------|-----------------|------|------|------|-----------------|
| C1   | N1   | Zn1  | 119.1(3)        | C14  | C15  | C16  | 118.0(4)        | C28  | C27  | C32  | 119.1(4)        |
| C1   | C6   | C5   | 120.5(4)        | C15  | O5   | Zn1  | 126.8(3)        | C28  | C27  | N4   | 116.7(4)        |
| C2   | C1   | N1   | 124.0(4)        | C15  | C14  | C13  | 124.3(4)        | C28  | C29  | C33  | 122.8(6)        |
| C2   | C3   | C7   | 120.6(5)        | C15  | C14  | C19  | 118.7(4)        | C29  | C28  | C27  | 120.7(5)        |
| C3   | C4   | C5   | 119.7(4)        | C16  | O6   | C20  | 117.5(4)        | C29  | C30  | C31  | 120.6(5)        |
| C3   | C2   | C1   | 119.9(4)        | C16  | C17  | C18  | 119.9(4)        | C30  | C31  | C36  | 118.4(5)        |
| C4   | C5   | C10  | 119.7(5)        | C17  | C16  | C15  | 121.3(4)        | C30  | C29  | C28  | 119.6(5)        |
| C4   | C3   | C2   | 120.7(4)        | C17  | C18  | N2   | 123.7(5)        | C30  | C29  | C33  | 117.6(6)        |
| C4   | C3   | C7   | 118.6(5)        | C18  | C19  | C14  | 121.4(4)        | C31  | C32  | C27  | 120.4(5)        |
| C6   | C5   | C4   | 119.9(4)        | C19  | C18  | C17  | 120.6(4)        | C32  | C27  | N4   | 124.2(4)        |
| C6   | C5   | C10  | 120.5(5)        | C19  | C18  | N2   | 115.7(5)        | C32  | C31  | C30  | 119.7(5)        |
| C6   | C1   | C2   | 119.2(4)        | C21  | C22  | C23  | 119.6(9)        | C32  | C31  | C36  | 121.9(5)        |
| C6   | C1   | N1   | 116.8(4)        | C21  | C26  | C25  | 119.5(10)       | C33  | O8   | C34  | 114.9(7)        |
| C7   | O2   | C8   | 116.8(5)        | C22  | C21  | C26  | 120.0(7)        | C35  | C34  | O8   | 115.1(13)       |
| C9   | C8   | O2   | 108.1(6)        | C22  | C21  | N3   | 124.5(7)        | C36  | O10  | C37  | 115.9(5)        |
| C10  | O4   | C11  | 117.2(5)        | C23  | C24  | C25  | 122.5(11)       | C38  | C37  | O10  | 107.8(6)        |
| C12  | C11  | O4   | 107.0(6)        | C24  | C23  | C22  | 120.6(11)       | C39  | N4   | C27  | 119.3(4)        |
| C13  | N1   | C1   | 119.7(4)        | C24  | C25  | C26  | 117.7(10)       | C39  | N4   | Zn1  | 117.9(3)        |
| C13  | N1   | Zn1  | 121.1(3)        | C26  | C21  | N3   | 115.5(7)        | C40  | C41  | C42  | 117.8(4)        |

| Atom | Atom | Atom | Angle/°  | Atom | Atom | Atom | Angle/°    | Atom | Atom | Atom | Angle/°    |
|------|------|------|----------|------|------|------|------------|------|------|------|------------|
| C13  | C14  | C19  | 117.0(4) | C27  | N4   | Zn1  | 122.7(3)   | C41  | O11  | Zn1  | 123.8(3)   |
| C41  | C40  | C45  | 118.8(4) | C52  | C47  | N6   | 124.8(6)   | O5   | C15  | C14  | 124.6(4)   |
| C41  | C40  | C39  | 125.6(4) | N1   | Zn1  | N4   | 118.13(15) | O5   | C15  | C16  | 117.4(4)   |
| C42  | O12  | C46  | 117.4(4) | N1   | C13  | C14  | 127.8(4)   | O6   | C16  | C17  | 125.9(4)   |
| C42  | C43  | C44  | 119.6(5) | N2   | N3   | C21  | 112.4(5)   | O6   | C16  | C15  | 112.8(4)   |
| C43  | C42  | C41  | 121.4(5) | N3   | N2   | C18  | 114.0(5)   | O7   | C33  | O8   | 123.2(7)   |
| C43  | C44  | N5   | 125.8(5) | N4   | C39  | C40  | 128.8(4)   | O7   | C33  | C29  | 125.2(8)   |
| C44  | C45  | C40  | 122.3(5) | N5   | N6   | C47  | 112.4(5)   | O8   | C33  | C29  | 111.6(6)   |
| C45  | C40  | C39  | 115.6(4) | N6   | N5   | C44  | 113.9(5)   | O9   | C36  | O10  | 124.2(6)   |
| C45  | C44  | C43  | 120.0(4) | O1   | C7   | O2   | 124.8(5)   | O9   | C36  | C31  | 122.3(6)   |
| C45  | C44  | N5   | 114.2(5) | O1   | C7   | C3   | 122.1(5)   | O10  | C36  | C31  | 113.5(6)   |
| C47  | C52  | C51  | 118.9(7) | O2   | C7   | C3   | 113.1(5)   | O11  | Zn1  | N1   | 117.38(14) |
| C47  | C48  | C49  | 120.2(7) | O3   | C10  | O4   | 123.5(5)   | O11  | Zn1  | N4   | 97.22(14)  |
| C48  | C47  | C52  | 120.3(6) | O3   | C10  | C5   | 124.1(5)   | O11  | C41  | C40  | 124.5(4)   |
| C48  | C47  | N6   | 114.9(6) | O4   | C10  | C5   | 112.4(5)   | O11  | C41  | C42  | 117.7(4)   |
| C49  | C50  | C51  | 120.3(7) | O5   | Zn1  | O11  | 115.09(14) | O12  | C42  | C43  | 124.5(5)   |
| C50  | C49  | C48  | 119.7(7) | O5   | Zn1  | N1   | 94.85(13)  | O12  | C42  | C41  | 114.1(4)   |
| C50  | C51  | C52  | 120.5(7) | O5   | Zn1  | N4   | 115.63(14) |      |      |      |            |
